# Supplementary material for: Characterisation of a LINE-1 Insertion in the RP1 Gene by Targeted Adaptive Nanopore Sequencing in a Family with Retinitis Pigmentosa
Source: Hindawi journal article supplement (doi:10.1155/2024/6580561), 2024-02-09
Supplement: f1 [file 6580561.f1.pdf]

## Supplementary File S1

The primers used for the PCR amplification of the predicted 64bp L1 insert and the L1 insert breakpoints identified by nanopore sequencing:

| Description              | Amplicon      | Forward primer 5'–3'               | Reverse primer 5'–3'               |
|--------------------------|---------------|------------------------------------|------------------------------------|
| Predicted 64bp L1 insert | 5' breakpoint | CATCCTCTACTGTCACTGCAAGA            | AGAGACTTAGACTCCCACACA              |
|                          | 3' breakpoint | TGTGTGGGAGTCTAAGTCTCT              | GCACTTGCTTTCACCTTATCCCC            |
| Nanopore L1 insert       | 5' breakpoint | Same as for the 64bp 5' breakpoint | Same as for the 64bp 5' breakpoint |
|                          | 3' breakpoint | TTTGGATTTTGGTTTTCTTGC              | TGGAATCGTGGAATTGAGA                |

The PCR cycling conditions for the 5'-breakpoint and for the initially predicted 3' breakpoint of the 64bp L1 insert were as follows:

| Temperature | Duration |           |
|-------------|----------|-----------|
| 94°C        | 10 min   | 35 cycles |
| 94°C        | 45 s     |           |
| 52°C        | 45 s     |           |
| 72°C        | 60 s     |           |
| 72°C        | 10 min   |           |

The 3'-breakpoint identified by nanopore sequencing was amplified using touchdown PCR. The cycling conditions for the 3'-breakpoint were as follows:

| Temperature    | Duration |           |
|----------------|----------|-----------|
| 94°C           | 10 min   | 10 cycles |
| 94°C           | 45 s     |           |
| 64°C -1°/cycle | 45 s     |           |
| 52°C           | 45 s     |           |
| 72°C           | 60 s     |           |
| 94°C           | 45 s     | 25 cycles |
| 54°C           | 45 s     |           |
| 72°C           | 45 s     |           |
| 72°C           | 5 min    |           |

The purified PCR products were prepared for sanger sequencing using BigDye Terminator v3.1 Cycle Sequencing Kit (Applied Biosystems, Thermo Fisher Scientific, Waltham, Massachusetts, USA) in 10 µl reaction volumes according to manufacturer's instructions with the following cycling parameters:

| Temperature | Duration |           |
|-------------|----------|-----------|
| 96°C        | 60 s     | 29 cycles |
| 96°C        | 10 s     |           |
| 52°C        | 10 s     |           |
| 60°C        | 4 min    |           |
