# Supplementary material for: Characterisation of a LINE-1 Insertion in the RP1 Gene by Targeted Adaptive Nanopore Sequencing in a Family with Retinitis Pigmentosa
Source: Hindawi journal article supplement (doi:10.1155/2024/6580561), 2024-02-09
Supplement: f2 [file 6580561.f2.pdf]

## Supplementary File S2

Sequences of the LINE-1 insertions in exon 4 of *RPI* fully covered by targeted adaptive nanopore sequencing from patients III.1 and III.2.

>Patient\_III\_1\_sequence\_1

```
GTGGGGTGTTAAAGTCTCCCATTTAATGGGAGTCTAAGTCTCTTTGTAGGTCAGTACTGAGGACTTGCTTTA
TGAATCTGGGTGCTCCTGTATTGGGTGCATAAATATTTAGGATAGTTAGCTCCTCTTGTGAATTGATCCC
TTTACCATTATGTAATGGCCTTCTTTGTCTCTTTTGGATCTTTGTTGGTTTTAAAGTCTGTTTTATCAGAGAC
TAGGATTGCAACCCCTGCCTTTTTTTGTTTTCCATTGGCTTGGTAGATCTTCTCCATCCTTTTTATTTTGA
GCCTATGTGTGTCTCTGCACGTGAGATAAATGGAATACAGCACACTGATGGGTCTTGACTCTTTATCCAAC
TTGCCAGTCTGTGTCTTTTAATTGCAGAAATTTAGTCCATTTATATTTAAAGTTAATATTGTTATGTGTGAA
TTTGATCCTGTCAATTATGATGTTAGCTGGTGATTTTGTCTATTAGTTGATGCAGTTTCTTCCCTAGTCTCGA
TGGTCTTTACATTTTGGCATGATTTTGCAGCGGCTGGTACCGGTTGTTCCCTTTCCATGTTTAGCGCTTCCCT
TCAGGAGCTCTTTTAGGGCAGGCCTGGTGGTGACAAAATCTCTCAACATTTGCTTGTCTATAAAGTATTTT
ATTTCTCCTTCACTTATGAAGCTTAGTTTGGCTGGATATGAAATCTGGGTTGAAAAATCTTTTCTTTAAG
AATGTTGAATATTGGCCCCACTCTCTTCTGGCTTGTAGGGTTTCTGCCGAGAGATCCGCTGTTAGTCTGA
TGGGCTTCTGAGGGTAACTTCCCTTTGCTTGGCTGCCCTAACATTTTTTCCCTTCACTTCAACTTTGGT
GAATCTGACAATTATGTGTCTTGGAGTTGCTCTTCTCGAGGAGTATCTTTGTGGCGTTCCTGTATTTCCCT
GAATCTGAACGTTGGCCTGCCTTGTCTAGATTGGGGAAGTCTCCTGGATAATATCCTGCAGAGTGTTTTCC
AACTTGGTTCATTTCTCCACATCACTTTCAGGTACACCAATCAGACGTAGATTTGGTCTTTTCCACATAGTC
CCATATTTCTTGGAGGCTTTGCTCATTCTTTTTATTCTTTTTTCTCTAAACTTCCCTTCTCGCTTCATTT
CATTCAATTCATCTTCCATTGCTGATACCCTTTCTTCCAGTTGATCGGCTCCTGAGGCTTGTGCATTCTTC
ACGTAGTTCTCGAGCCTTGGTTTTAGCTCCATCAGCTCCTTTAAGCACTTCTCTGTATTGGTTATTCTAG
TTATACATTTCTTAAATTTTTTCAAAGTTTTCAACTTCTTTGCCTTTGGTTTTGAATGTCCTCCCGTAGC
TCAGAGTAATTTGATCGTCTGAAGCCTTCTTCTCAGCTCATCAAAATCATTCTCCATCCAGCTTTGTTT
TGTTGCTGGTGAGGAACTGCGTTCCTTTGGAGGAGGAGAGGCGCTCTGCGTTTTAGAGTTTTCCAGTTTTTC
TGTTCTGTTTTTCCCATCTTTGTGGTTTTATCTACTTTTGGTCTTTGATGATGGTGTACAGATGGG
TTTTTGGTGTAGATGTCCTTTCTGGTTGTTAGTTTTCTTCTAACAGACAGGACTTTAACACTCCACTGT
CAACATTAGACAGATCAACGAGATAGAAAAGTCAACAAGGATACCCAGGAATTGAACTCAGCTCTGCACCAA
GCAGACCTAATAGACATCTACAGAACTCTCCACCCCAAATCAACAGAATATACATTTTTTTTCCAGCACCACA
CCACACCTATTTCCAAAATTGACCACATAGTTGGAAGTAAAGCTCTCCTCAGCAAATGTAAGAAGACAGAAA
TTATAACAACTATCTCTCAGACCACAGTGAATCAAACTAGAACTCAGGATTAAGAATCTCACTCAAAGC
CGCTCAACTACATGGAAGTGAACAACCTGCTCCTGAATGACTACTGGGTACATAACGAAATGAAGGCAGA
AATAAAGATGTTCTTTGAAACCAACGAGAACAAGACACCACATACCAGAATCTCTGGGACGCATTCAAAG
CAGTGTGTAGAGGGAAATTTATAGCACTAAATGCCTAAGCAAGAGAAAAGCAGGAAAGATCCAAAATGACA
CCCTAACATCACAATTAAGAAGTGAAGAAAGCAAGAGCAAACACATTTCAAAGCTAGCAGAAGGCAAGAA
ATAACTAAAATCAGAGCAGAACTGAAGGAAATAGAGACACAAAAACCCTTCAAAAAATCAATGAATCCAG
GAGCTGGTTTTTTGAAAGGATCAAAAAATGATAGACCGCTAGCAAGACTAATAAAGAAAAAAGAGAGAA
GAATCAAAATAGACACAATAAAAAATGATAAAGGGGATATCACCACCGATCCCACAGAAAATACAACTACCA
TCAGAGAATACTACAAACACCTCTACGCAATAAATAAAGTGAAGAAATCTAGAAGAAATGGATACATTTCTCGAC
ACATACACTCTCCCAAGACTAAACCAGGAAGAAGTTGAATCTGAAATCGATCAATAACAGGCTCTGAAAT
TGTGGCAATAATCAATAGTTTTACCAACCAAAAAGAGTCCAGGACCAGATGGATTACAGCCGAATTCTACC
AGAGGTACAAGGAGGAACTGGTACCATTCTTCTGAAACTATTCCAATCAATAGAAAAAGAGGGAATCCTC
CCTAACTCATTTTTATGAGGCCAGCATCATTCTGATACCAAAGCCGGGCAGAGACACAACCAAAAAAGAGAA
TTTTAGACCAATATCCTTGATGAACATTGATGCAAAAATCCTCAATAAAAATACTGGCAAACCGAATCCAGC
ACATCAAAAAGCTTATCCACCATGATCAAGTGGGCTTCATCCCTGGGATGCAAGGCTGTTCAATATACGC
AAATCAATAAATGTAATCCAGCATATAAACAGAGCCAAAGACAAAAACCACATGATTATCTCAATAGATGC
AGAAAAAGCCTTTGACAAAATCAACAACCCTTCATGCTAAAAACTCTCAATAAATTAGGTATTGATGGGA
CGTATTTCAAATAATAAGAGCTATCTATGACAAACCCACAGCCAATATCATACTGAATGGGCAAAAACCTG
GAAGCATTCCTTTGAAAACCGGCACAAGACAGGGATGCCCTCTCTCACCCTCTATTTCAACATAGTGTT
GGAAGTTCTGGCCAGGGCAATCAGGCAGGAGAAGGAAATAAAGGTTATTCAATTAGGAAAAGAGGAAGTCA
AATTGTCCCTGTTTGCAGACGACATGATTGTTTATCTAGAAAACCCCATCGTCTCAGCCCAAAATCTCCTT
AAGCTGATAAGCAACTTCAGCAAAGTCTCAGGATACAAAATCAATGTACAAAAATCACAAGCATTCTTATA
CACCAACAACAGACAAACAGAGAGCCAAATCATGGGTGAACTCCCATTCACAATTGCTTCAAAGAGAATAA
AATACCTAGGAATCCAATTCACAAGGGATGTGAAGGACCTCTTCAAGGAGAACTACAAACCCTGCTCAAG
GAAATAAAGAGGAGACAAACAAATGGAAGAACATTCCATGCTCATGGGTAGGAAGAATCAATATCGTGAA
```

AATGGCCATACTGCCCAAGGTAATTTACAGATTCAATGCCATCCCCATCAAGCTACCAATGACTTTTCTTCA  
CAGAATTGGAaaaaactactTTAAAGTTCATATGGAACCAaaaaagagccccgattGCCAAGTCAATCCTA  
AGCCAAAAGAACAAAGCTGGAGGCATCACACTACCTGACTTCAAATACTACAAGGCTACAGTAACCAA  
AACAGCATGGTACTGGTACCAAAACAGAGATATAGATCAATGGAACAGAACAGAGCCCTCAGAAATAATGC  
CGCATATCTACAACCTATCTGATCTTTGACAAACCTGAGAAAAACAAGCAATGGGGAAAGGATTCCCTATTT  
AATAAATGGTGTGGGAAAACCTGGCTAGCCATATGTAGAAAGCTGAAACTGGATCCCTTCCTTACACCTTA  
TACAAAAATCAATTCAAGATGGATTAAAGATTTAAACGTTAAACTCAAACCATAAAAAACCCTAGAAGAAA  
ACCTAGGCATTACCATTTCAGGACATAGGCGTGGGCAAGGACTTCATGTCCAAAACACCAAAAGCAATGGCA  
ACAAAAGACAAAATTGACAAAATGGGATCTAATTAACCTAAAGAGCTTCTGCACAGCAAAAGAACTACCAT  
CAGAGTGAACAGGCAACCTACAACATGGGAGAAAATTTTTGCAACCTACTCATCTGACAAAGGGCTAATAT  
CCAGAATCTACAATGAACTCAAACAAATTTACAAGAAAAAAACAACAACCCCATCAAAAAGTGGGCGAAG  
GACATGAACAGACACTTCTCAAAGAAGACATTTATGCAGCCAAAAAACACATGAAGAAATGCTCATCATC  
ACTGGCCATCAGAGAAATGCAAAATCAAACCCTATGAGATATCATCTCACACCAGTTAGAATGGCAATCA  
TTAAAAAGTCAGGAAACAACAGGTGCTGGAGAGGATGCGGAGAAATAGGAACACTTTTACACTGTTGGTGG  
GACTGTAAACTAGTTCAACCATTGTGGAAGTCAGTGTGGCGATTCCCTCAGGGATCTAGAACTAGAAATACC  
ATTTGACCCAGCCATCCATTACTGGGTATATACCCAAATGAGTATAAATCATGCTGCTATAAAGACACAT  
GCACACGTATGTTTATTGCGGCCTATTTCACAATAGCAAAGACTTGAACCAACCCAAATGTCCAACAATG  
ATAGACTGGATTAAGAAAATGTGGCACATATACACCATGGAATACTATGCAGCCATAAAAAATGATGAGTT  
CATATCCTTTGTAGGGACATGGATGAAATTGGAACCATCATTCTCAGCAAACCTATCGCAAGAACAAAAAA  
CCAAACACCCGATATTCTCACTCATAGGTGGGAATTGAACAATGAGATCACATGGACCCAGGAAGGGGAAC  
ATCACACTCTGGGACTGTGGTGGGCCGGGGGAGGGGGAGGGATAGCATTGGGAGATATACCTAATGCTA  
GATGACACATTAGTGGGTGCAGCGCACAGCATGGCACATGTATACATATGTAACCTGCACAATGTG  
CACATGTACCCTAAAACCTTAGAGTATAATAAAAAAAAAAAAAAAAAAAAAAAAAATAGAAAAGAAAGAAATAAATAAAA  
AAAGAAAAGAAAGAAAGAAAGAAAGAAAGAAAGAAAGAAAGAAAGAAAGAAAGAAAGAAAGAAAGAAAGAA  
AGAAAAGAAAGAAAGAAAGAAAGAAAGAAAGAAAGAAAGAAAGAAAGAAAGAAAGAAAGAAAGAAAGAA  
TGTTTTCTTGCTATTGAGTTGTTTGGTTCCTTATATATTTTTGAGTAATAATCCCTTATCAGATGTATGCT  
TTGCAAAATAAATTTTTCCATTCCATGCAAAAAAAAAAAAAAAAAAAAAAAAAAAAAAAAAAAAAAAAAAAGAATG  
AGAGAATA

>Patient\_III\_2\_sequence\_1

GTGGGGTGTAAAGTCTCCCATTTAATGTGTGGGAGTCTAAGTCTCTTTGTAGGTCCTGAGGACTTGC  
TTTATGAATCTGGGTGCTCCTGTATTGGGTGCATAAAATATTTAGGATAGTTAGCTCCTCTTGTTGAATTGA  
TCCCTTTACCATTATGTAATGGCCTTCTTTGTCTCTTTTGATCTTTGTTGGTTTAAAGTCTGTTTTATCAG  
AGACTAGGATTGCAACCCCTGCCTTTTTTTGTTTTCCATTGGCTTGGTAGATCTTCTCCATCCTTTTTATT  
TTGAGCCTATGTGTGTCTCTGCACGTGAGATGGGTTTCTGAATACAGCACACTGATGGGTCTTGACTCTT  
TATCCAACCTGCCAGTCTGTGTCTTTAATTGCAGAATTTAGTCCATTTATATTTAAAGTTAATATTGTTA  
TGTGTGAATTTGATCCTGTCAATATGATGTTAGCTGGTGAATTTGCTCATTAGTTGATGCAGTTTCTTCT  
AGTCTCGATGGTCTTTACATTTTGGCATGATTTTGCAGCGCTGGTACCGGTTGTTCCCTTTCCATGTTTAG  
CGCTTCTCAGGAGCTCTTTTAGGGCAGGCCTGGTGGTGACAAAATCTCTCAACATTTGCTTGTCTATAA  
AGTATTTTATTTCTCCTTCACTTATGAAGCTTAGTTTGGCTGGATATGAAATCTGGGTTGAAAATCTTT  
TCTTTAAGAAATGTTGAATATTGGTCCCCTCTCTTCTGGCTTGTAGGGTTTCTGCCGAGAGATCCGCTGT  
TAGTCTGATGGGCTTTTCTTTGAGGGTAACCCGACCTTTCTCTCTGGCTGCCCTTAACATTTTTTCTTCA  
TTTCAACTTTGGTGAATCTGACAATTATGTGTCTTGGAGTTGTTCTTCTCGAGGAGTATCTTTGTGGCGTT  
CTCTGATTTTCTGAATCTGAACGTTGGCCTGCCTTGTAGATTGGGGAAGTTCTCCTGGATAATATCCTG  
CAGAGTGTTCCTCAACTTGGTTCCATTTCTCCACATCACTTTCAGGTACACCAATCAGACGTAGATTTGGTC  
TTTTACATAGTCCCATATTTCTGGAGGCTTTGCTCATTTCTTTTTATTCTTTTTTCTCTAAACTTCCCT  
TCTCGCTTCATTTCAATTCATTTCACTTCCATTGCTGATACCCTTTCTTCCAGTTGATCGCATCGGCTCCT  
GAGGCTTCTGCATTTCTCACGTAGTTCTCGAGCCTTGGTTCAGCTCCATCAGCTCCTTTAAGCACTTCT  
CTGTATTGGTTATTCTAGTTATACATTTCTTCTAAATTTTTTCAAAGTTTTCAACTTCTTTGCCTTTGGTT  
TGAATGTCCTCCCGTAGCTCAGAGTAATTTGATCGTCTGAAGCCTTCTTCTCTCAGCTCATCAAAATCATT  
CTCCATCCAGCTTTGTTCTGTTGCTGGTGGGAACTGCGTTCCCTTTGGAGGAGGAGAGGGCGCTCTGCGTTT  
TAGAGTTTCCAGTTTTTCTGTTCTGTTTTTTCCCATCTTTGTGGTTTTATCTACTTTTGGTCTTTGATGA  
TGGTGTATACAGATGGGTTTTCGGTGTAGATGTCTTTCTGGTTGTTAGTTTTCTTCTAACAGACAGGA  
CCCTTTAACACCCCACTGTCAACATTAGACAGATCAACGAGACAGAAAGTCAACAAGGATACCCAGGAATT  
GAACTCAGCTCTGCACCAAGCAGACCTAATAGACATCTACAGAACTCTCCACCCCAATCAACAGAATATA  
CATTTTTTTCAGCACCACACCACCTATTCCAAAATTGACCACATAGTTGGAAGTAAAGCTCTCCTCAGC  
AAATGTAAAAGAACAGAAATTATAACAACCTATCTCTCAGACCACAGTGAATCAAACCTAGAACTCAGGAT  
TAAGAATCTCACTCAAAGCCGCTCAACTACATGGAACTGAACAACCTGCTCCTGAATGACTACTGGGTAC

ATAACGAAATGAAGGCAGAAATAAAGATGTTCTTTGAAACCAACGAGAACAAAGACACCACATAACCAGAAT  
CTCTGGGACGCATTCAAAGCAGTGTGTAGAGGGAAATTTATAGCACTAAATGCCTAAAAGAGAAAGCAGGA  
AAGATCCAAAATTGACACCCTAACATCACAATTTAAAAGAACTAGAAAAGCAAGAGCAAACACATTCAAAG  
CTAGCAGAAGGCAAGAAATAACTAAAATCAGAGCAGAACTGAAGGAAATAGAGACACAAAAACCCTTCAA  
AAAAATCAATGAATCCAGGAGCTGGTTTTTTGAAAGGATCAACAAAATTGATAGACCGCTAGCAAGACTAA  
TAAAGAAAAAAGAGAGAAGAATCAAATAGACACAATAAAAAATGATAAAGGGGATATCACCACCGATCCC  
ACAGAAAATACAACTACCATCAGAGAATACTACAAACACCTCTACGCAAATAAACTAGAAAATCTAGAAGA  
AATGGATACATTCCTCGACACATACACTCTCCAAGACTAAACCAGGAAGAAGTTGAATCTCTGAATCGAC  
CAATAACAGGCTCTGAAATTGTGGCAATAATCAATAGTTTACCAACCAAAAAGAGTCCAGGACCAGATGGA  
TTCACAGCCGAATTCTACCAGAGGTACAAGGAGGAACTGGTACCATTCTTCTGAAAATTTCCAATCAAT  
AGAAAAAGAGGGAATCCTCCCTAACTCATTTTTATGAGGCCAGCATCATTCTGATACCAAAGCCGGGCAGAG  
ACACAACCAAAAAGAGAATTTTAGACCAATATCCTTGATGAACATTGATGCAAAAAATCCTCAATAAAATA  
CTGGCAAACCGAATCCAGCAGCACATCAAAAAGCTTATCCACCATGATCAAGTGGGCTTCATCCCCTGGGA  
TGCAAGGCTGGTTCAATATACGCAAATCAATGTAATCCAGCATATAAACAGAGCCAAAGACAAAACCACA  
TGATTATCTCAATAGATGCAGAAAAGCCTTTGACAAAATTCACAACCCCTTCATGCTAAAACTCTCAAT  
AAATTAGGTATTGATGGGACGTATTTCAAATAATAAGAGCTATCTATGACAAAACCCACAGCCAATATCAT  
ACTGAATGGGCAAAAACCTGGAAGCATTCCTTTGAAAACCGGCACAAGACAGGGATGCCCTCTCTCACCGC  
TCCTATTCACATAGTGTGGAGTTCTGGCCAGGGCAATCAGGCAGGAGAAGGAAAATAAAGGGTATTCAA  
TTAGGAAAAGAGGAAGTCAAATTGTCCCTGTTTGAGACGACATGATTGTTTATCTAGAAAACCCCATCGT  
CTCAGCCCAAATCTCCTTAAGCTGATAAGCAACTTCAGCAAAGTCTCAGGATACAAAATCAATGTACAAA  
AATCACAAGCATTCCTTATACCAACAACAGACAAAACAGAGAGCCAAATCATGAGTGAACCTCCATTCA  
ATTGCTTCAAAGAGAATAAAAATACCTAGGAATCCAATTCACAAGGGATGTGAAGGACCTCTTCAAAGGAGAA  
CTACAAAACCACTGCTCAAGGAAAATAAAGAGGAGACAAAACAAATGGAAGAACATTCATGCTCATGGGTAG  
GAAGAATCAATATCGTGAAAATGGCCATACTGCCCAAGGTAATTTACAGATTCAATGCCATCCCCATCAAG  
CTACCAATGACTTTCTTACAGAAATGGAAAAACTACTTTAAAGTTCATATGGAACCAAAAAGAGCCCG  
CATTGCCAAGTCAATCCTAAGCCAAAAGAACAAGCTGGAGGCATCACACTACCTGACTTCAAACCTATACT  
ACAAGGCTACAGTAACCAAAAACAGCATGGTACTGGTACCAAAAACAGAGATATAGATCAATGGAACAGAACA  
GAGCCCTCAGAAATAATGCCGCATATCTACAACATCTGATCTTTGACAAACCTGAGAAAAACAAGCAATG  
GGGAAAAGGATTCCTATTTAATAAATGGTGTGGGAAAACTGGCTAGCCATATGTAGAAAGCTGAAACTGG  
ATCCCTTCTTACACCTTATACAAAATCAATTCAAGATGGATTAAAGATTTAAACGTTAAACCTAAAACC  
ATAAAAACCTTAGAAGAAAACCTAGGCATTACCATTAGGACATAGGCGTGGGCAAGGACTTCATGTCCAA  
AACACCAAAAAGCAATGGCAACAAAAGACAAAATTTGACAAAATGGGATCTAATTTAACTAAAGAGCTTCTGCA  
CAGCAAAAAGAACTACCATCAGAGTGAACAGGCAACCTACAACATGGGAGAAAATTTTGAACCTACTCA  
TCTGACAAAGGGCTAATATCCAGAACTACAATGAACTCAAACAAATTTACAAGAAAAAACAACAACCC  
CATCAAAAAGTGGGCGAAGGACATGAACAGACACTTCTCAAAAAGAAGACATTTATGCAGCCAAAAACACA  
TGAAGAAAATGCTCATCATCACTGGCCATCAGAGAAATGCAAAATCAAACCACTATGAGATATCATCTCACA  
CCAGTTAGAATGGCAATCATTTAAAAGTCAAGAAACAACAGGTGCTGGAGAGGATGCGGAGAAATAGGAAC  
ACTTTTACACTGTTGGTGGGACTGTAACTAGTTCAACCATTTGTGGAAGTCAAGTGTGGCGATTCTCAGGG  
ATCTAGAACTAGAAATACCATTTGACCCAGCCATCCCATTAAGTGGTATATACCCAAATGAGTATAAATCA  
TGCTGTATAAAGACACATGCACACGTATGTTTATTGCGGCATATTCACAATAGCAAAGACTTGGAAACCA  
ACCCAAATGTCCAACAATGATAGACTGGATTAAGAAAATGTGGCACATATACCCATGGAATACTATGCAG  
CCATAAAAAATGATGAGTTCATATCCTTTGTAGGGACATGGATGAAAATTGGAAATCATCATTCTCAGTAA  
ACTATCGCAAGAACAAAAAACCAAAACCCGCATATTCTCACTCATAGGTGGGAATTGAACAATGAGATCAC  
ATGGACCCAGGAAGGGGAATATCACACTCTGGGACTGTGGTGGGGTTCGGGAGGGGGGAGGGATAGCATT  
GGGAGATATACCTAATGCTAGATGACACATTAGTGGGTGCAGCGCACCAGCATGGCACATGTATACATATG  
TAACTAACCTGCACAATGTGCACATGTACCCTAAAACCTAGAGTATAATAAAAAAAAAAAAAAAAAAAAAA  
GAAAGAAAAGAAATAAATAAAAAAGAAAGAAAGAAAGAAAGAAAGAAAGAAAGAAAGAAAGAAAGAAAG  
AAAGAAAGAAAGAAAGAAAGAAAGAAAGAAAGAAAGAAAGAAAGAAAGAAAGAAAGAAAGAAAGAAAG  
CCTATTTTTTGAATTTGGATTTTGGTTTTCTTGCTATTGAGTTGTTTGGTTCCTTATATATTTTTGAGTAA  
TAACTCCTTATCAGATGTATGCTTTGCAAATAAATTTCCCATTCATGCAAAAAAAAAAAAAAAAAAAAAA  
AAAAAAAAAAAAAGAATGAGAGAATA

>Patient\_III\_2\_sequence\_2

GTGGTGTAAAGTCTCCCATTAATGTGTGGGAGTCTAAGTCTCTTTGTAGGTCACTGAGGACTTGCTT  
TATGAATCTGGGTGCTCCTGTATTGGGTGCATAAATATTTAGGATAGTTAGCTCCTCTTGTGAAATTGATC  
CCTTTACCATTATGTAATGGCCTTCTTTGTCTCTTTTGATCTTTGTTGGTTTTAAAGTCTGTTTTATCAGAG  
ACTAGGATTGCAACCCCTGCCTTTTTTTGTTTTCCATTGGCTGGTAGATCTTCTCCATCCTTTTTATTTT  
GAGCCTATGTGTGTCTCTGCACGTGAGATGGGTTTTCTGAATACAGCACACTGATGGGTCTTGACTCTTTA

TCCAAC TTGCCAGTCTGTGTCTTTTAATTGCAGAATTTAGTCCATTTATATTTAAAGTTAATATTGTTATG  
TGTGAATTTGATCCTGTCAATTATGATGTTAGCTGGTGATTTTGCTCATTAGTTGATGCAGTTTCTTCCCTAG  
TCTCGATGGTCTTTACATTTTGGCATGATTTTGCAGCGGCTGGTACCGGTTGTTCCCTTCCATGTTTAGCG  
CTTCCCTCAGGAGCTCTTTTAGGGCAGGCCTGGTGGTGACAAAATCTCTCAACATTTGCTTGTCTATAAAG  
TATTTTATTTCTCCTTCACTTATGAAGCTTAGTTTGGCTGGATATGAAATTCTGGGTTGAAAATTTCTTTTC  
TTTAAAGAAATGTTGAATATTGGCCCCACTCTCTTCTGGCTTGTAGGGTTTCTGCCGAGAGATCCGCTGTTA  
GTCTGATGGGCTTTTCTTTGAGGGTAACCCGACCTTTCTCTCTGGCTGCCCTTAACATTTTTTCTTTCATT  
TCAACTTTGGTGAATCTGACAATTATGTGTCTTGGAGTTGCTCTTCTCGAGGAGTATCTTTGTGGCGTTCT  
CTGTATTTCCCTGAATCTGAACGTTGGCCTGCCTTGTCTAGATTGGGGAAGTTCTCCTGGATAATATCCTGCA  
GAGTGTTTTCCAAC TTGGTTCCAT TCTCCACATCACTTT CAGGTACACCAATCAGACGTAGATTTGGTCTT  
TTCACATAGTCCCATATTTCTTGGAGGCTTTGCTCATTCTTTTTATTCTTTTTTCTCTAAACTTCCCTTC  
TCGCTTCATTTCACTTCACTTTCATCTTCCATTGCTGATACCCTTTCTTCCAGTTGATCGCATCGGCTCCTGA  
GGCTTCTGCATTCTTACGTAGTTCTCGAGCCTTGGTTTTT CAGCTCCATCAGCTCCTTTAAGCACTTCTCT  
GTATTGGTTATTCTAGTTATACAT TCTTCTAAATTTTTTTCAAAGTTTTTCAACTTCTTTGCCTTTGGTTTG  
AATGTCCTCCCGTAGCTCAGAGTAATTTGATCGTCTGAAGCCTTCTTCTCTCAGCTCATCAAATCATTCT  
CCATCCAGCTTTGTTCTGTTGCTGGTGAGGAACTGCGTTCCCTTTGGAGGAGGAGAGGCGCTCTGCGTTTTA  
GAGTTTCCAGTTTTTCTGTTCTGTTTTTTCCCATCTTTGTGGTTTTATCTACTTTTGGTCTTTGATGATG  
GTGATGTACAGATGGGTTTTTCGGTGTAGATGTCCTTTCTGGTTGTTAGTTTTCTTCTAACAGACAGGACC  
CTTTAACACCCCACTGTCAACATTAGACAGATCAACGAGACAGAAAGTCAACAAGGATACCCAGGAATTGA  
ACTCAGCTCTGCACCAAGCAGACCTAATAGACATCTACAGAACTCTCCACCCCAAATCAACAGAATATACA  
TTTTTTTTCAGCACCACACCACACTATTCCAAAATTGACCACATAGTTGGAAGTAAAGCTCTCCTCAGCAA  
ATGTAAGAAAGAACAGAAATTATAACAACTATCTCTCAGACCACAGTGCAATCAAAC TAGAACTCAGGATTA  
AGAATCTCACTCAAAGCCGCTCAACTACATGGAACTGAACAACCTGCTCCTGAATGACTACTGGGTACAT  
AACGAAATGAAGGCAGAAATAAAGATGTTCTTTGAAACCAACGAGAACAAGACACCACATACCAGAATCT  
CTGGGACGCATTCAAAGCAGTGTGTAGAGGGAAATTTATAGCACTAAATGCCTACAAGAGAAAGCAGGAAA  
GATCCAAAATTGACACCCTAACATCACAATTTAAAGAAGCTAGAAAAGCAAGAGCAAAACACATTCAAAAGCT  
AGCAGAAGGCAAGAAATAACTAAAAATCAGAGCAGAACTGAAGGAAATAGAGACACAAAAACCCTTCAAAA  
AATCAATGAATCCAGGAGCTGGTTTTTTTGAAGGATCAACAAAATTGATAGACCGCTAGCAAGACTAATAA  
AGAAAAAAGAGAGAAGAATCAAAATAGACACAATAAAAAATGATAAAGGGGATATCACCACCGATCCCACA  
GAAATACAACTACCATCAGAGAACTACAAACACCTCTACGCAAATAAACTAGAAAATCTAGAAGAAAT  
GGATACATTCCTCGACACATACACTCTCCCAAGACTAAACCAGGAAGAAGTTGAATCTCTGAATCGACCAA  
TAACAGGCTCTGAAATTGTGGCAATAATCAATAGTTTACCAACCAAAAAGAGTCCAGGACCAGATGGATTC  
ACAGCCGAATTCACCAGAGGTACAAGGAGGAACTGGTACCATTCTTCTGAAACTATTCCAATCAATAGA  
AAAAGAGGGAAATCCTCCCTAACTCATTTTATGAGGCCAGCATCATTCTGATACCAAAGCCGGGCAGAGACA  
CAACCAAAAAGAGAATTTTAGACCAATATCCTTGATGAACATTGATGCAAAAATCCTCAATAAAAATACTG  
GCAAACCGAATCCAGCAGCACATCAAAAAGCTTATCCACCATGATCAAGTGGGCTTCATCCCTGGGATGCA  
AGGCTGGTTCAATATACGCAAAATCAATAAATGTAATCCAGCATATAAACAGAGCCAAAAGACAAAAACCACA  
TGATTATCTCAATAGATGCAGAAAAGCCTTTGACAAAATTCACAACCCCTTCATGCTAAAACTCTCAATA  
AATTAGGTATTGATGGGACGTACTTCAAATAATAAGAGCTATCTATGACAAACCCACAGCCAATATCATA  
CTGAATGGGCAAAAAGCTGGAAGCATTCCTTTGAAAACCGGCACAAGACAGGGATGCCCTCTCTCACCGCT  
CCTATTC AACATAGTGTGGAAAGTTCTGGCCAGGGCAATCAGGCAGGAGAAGGAAATAAAGGGTATTCAAT  
TAGGAAAAGAGGAAGTCAAATGTCCCTGTTTGCAGACGACATGATTGTTTATCTAGAAAACCCCATCGTC  
TCAGCCCAAATCTCCTTAAGCTGATAAGCAACTTCAGCAAAGTCTCAGGATACAAAATCAATGTACAAAA  
ATCACAAGCATTCTTATACACCAACAACAGACAAACAGAGAGCCAAATCATGGGTGAATCCCATTACAAA  
TTGCTTCAAAGAGAATAAAAATACCTAGGAATCCAACCTTACAAGGGATGTGAAGGACCTCTTCAAGGAGAAC  
TACAAACCACTGCTCAAGGAAATAAAAGAGGAGACAAAATAAAGGAAGAACATTCCATGCTCATGGGTAGG  
AAGAATCAATATCGTGAAAATGGCCATACTGCCCAAGGTAATTTACAGATTCAATGCCATCCCCATCAAGC  
TACCAATGACTTTCTTACAGAAATGGAAAAAACTACTTTAAAGTTCATATGGAACCAAAAAGAGCCCGC  
ATTGCCAAGTCAATCCTAAGCCAAAAGAACAAGCTGGAGGCATCACACTACCTGACTTCAAACCTATACTA  
CAAGGCTACAGTAACCAAAAACAGCATGGTACTGGTACCAAAAACAGAGATATAGATCAATGGAACAGAACAG  
AGCCCTCAGAAATAATGCCGCATATCTACAACCTATCTGATCTTTGACAAACCTGAGAAAAACAAGCAATGG  
GGAAAGGATTCCTATTTAATAAATGGTGCTGGGAAAACCTGGCTAGCCATATGTAGAAAAGCTGAAACTGGA  
TCCCTTCTTACACCTTATACAAAAATCAATTC AAGATGGATTAAAGATTTAAACGTTAAACCTAAAACCA  
TAAAAACCTTAGAAGAAAACCTAGGCATTACCATT CAGGACATAGGCGTGGGCAAGGACTTCATGTCCAAA  
ACACCAAAAAGCAATGGCAACAAAAGACAAAATGACAAATGGGATCTAATTAAACTAAAGAGCTTCTGCAC  
AGCAAAAAGAACTACCATCAGAGTGAACAGGCAACCTACAACATGGGAGAAAATTTTGTCAACCTACTCAT  
CTGACAAAAGGGCTAATATCCAGAATCTACAATGAACTCAAACAAATTTACAAGAAAAAACAACAACCC  
ATCAAAAAGTGGGCGAAGGACATGAACAGACACTTCTCAAAAAGAAGACATTTATGCAGCCAAAAAACACAT

GAAGAAATGCTCATCATCACTGGCCATCAGAGAAATGCAAATCAAACCCTATGAGATATCATCTCACAC  
 CAGTTAGAATGGCAATCATTA AAAAGTCAGGAAACAACAGGTGCTGGAGAGGATGCGGAGAAATAGGAACA  
 CTTTTACTGTGGTGGGACTGTAACTAGTTCAACCATTGTGGAAGTCAGTGTGGCGATTCCCTCAGGGA  
 TCTAGA ACTAGAAATACCATTTGACCCAGCCATCCCATTACTGGGTATATACCCAAATGAGTATAAATCAT  
 GCTGCTATAAAGACACATGCACACGTATGTTTATTGCGGCCTATTCCACAATAGCAAAGACTTGAACCAA  
 CCCAAATGTCCAACAATGATAGACTGGATTAAGAAAATGTGGCACATATACACCATGGAATACTATGCAGC  
 CATAAAAAATGATGAGTTCATATCCTTTGTAGGGACATGGATGAAATTGGAAACCATCATTCTCAGTAAAC  
 TATCGCAAGAACA AAAAACCAAACACCGCATATTCTCACTCATAGGTGGGAATTGAACAATGAGATCATGG  
 ACCCAGGAAGGGGAATATCACACTCTGGGGACTGGGGGTGGGGTTCGGGGGAGGGGGGAGGGATAGCATTGG  
 GAGATATACCTAATGCTAGATGACACATTAGTGGGTGCAGCGCACCAGCATGGCACATGTATACATATGTA  
 ACTAACCTGCACAATGTGCACATGTACCCTAAAACCTTAGAGTATAATAAAAAAAAAAAAAAAAAAAAAATA  
 GAAAGAAAGAAATAAATAAAAAAGAAAGAAAGAAAGAAAGAAAGAAAGAAAGAAAGAAAGAAAGAAAGAAAG  
 AAAGAAAGAAAGAAAGAAAGAAAGAAAGAAAGAAAGAAAGAAAGAAAGAAAGAAATGTCTATTGAGTCTATTG  
 ACTCCTTATCAGATGTATGCTTTGCAAATAAATTTTCCCATTCATGCAAAAAAAAAAAAAAAAAAAAAA  
 AAAAAAAAAAAAAAAAAAAAAAAAAAAGAAATGAGAGAATA

The fully covered LINE-1 insertions were aligned with MUSCLE multiple sequence alignment using Unipro UGENE (v.49.0).

III.1\_1 GTGGGGTGTAAAGTCTCCCATTTAA---TGGGAGTCTAAGTCTCTTTGTAGGTCCTGAGGACTTG 70  
 III.2\_1 GTGGGGTGTAAAGTCTCCCATTTAAATGTGTGGGAGTCTAAGTCTCTTTGTAGGTCCTGAGGACTTG 70  
 III.2\_2 GT--GGTGTAAAGTCTCCCATTTAAATGTGTGGGAGTCTAAGTCTCTTTGTAGGTCCTGAGGACTTG 70  
 \*\* \*\*\*\*\*

III.1\_1 CTTTATGAATCTGGGTGCTCCTGTATTGGGTGCATAAATATTTAGGATAGTTAGCTCCTCTGTTGAATT 140  
 III.2\_1 CTTTATGAATCTGGGTGCTCCTGTATTGGGTGCATAAATATTTAGGATAGTTAGCTCCTCTGTTGAATT 140  
 III.2\_2 CTTTATGAATCTGGGTGCTCCTGTATTGGGTGCATAAATATTTAGGATAGTTAGCTCCTCTGTTGAATT 140  
 \*\*\*\*\*

III.1\_1 GATCCCTTTACCATTATGTAATGGCCTTCTTTGTCTCTTTTGATCTTTGTTGGTTTAAAGTCTGTTTTAT 210  
 III.2\_1 GATCCCTTTACCATTATGTAATGGCCTTCTTTGTCTCTTTTGATCTTTGTTGGTTTAAAGTCTGTTTTAT 210  
 III.2\_2 GATCCCTTTACCATTATGTAATGGCCTTCTTTGTCTCTTTTGATCTTTGTTGGTTTAAAGTCTGTTTTAT 210  
 \*\*\*\*\*

III.1\_1 CAGAGACTAGGATTGCAACCCCTGCCTTTTTTTGTTTTCCATTGGCTTGGTAGATCTTCCTCCATCCTTT 280  
 III.2\_1 CAGAGACTAGGATTGCAACCCCTGCCTTTTTTTGTTTTCCATTGGCTTGGTAGATCTTCCTCCATCCTTT 280  
 III.2\_2 CAGAGACTAGGATTGCAACCCCTGCCTTTTTTTGTTTTCCATTGGCTTGGTAGATCTTCCTCCATCCTTT 280  
 \*\*\*\*\*

III.1\_1 TATTTGAGCCTATGTGTCTCTGCACGTGAGATAAAT---GGAATACAGCACACTGATGGGTCTTGA 350  
 III.2\_1 TATTTGAGCCTATGTGTCTCTGCACGTGAGATGGGTTTCCTGAATACAGCACACTGATGGGTCTTGA 350  
 III.2\_2 TATTTGAGCCTATGTGTCTCTGCACGTGAGATGGGTTTCCTGAATACAGCACACTGATGGGTCTTGA 350  
 \*\*\*\*\* \* \*\*\*\*\*

III.1\_1 CTCTTTATCCAACCTGCCAGTCTGTCTTTTAAATGTCAGAATTTAGTCCATTTATATTTAAAGTTAATA 420  
 III.2\_1 CTCTTTATCCAACCTGCCAGTCTGTCTTTTAAATGTCAGAATTTAGTCCATTTATATTTAAAGTTAATA 420  
 III.2\_2 CTCTTTATCCAACCTGCCAGTCTGTCTTTTAAATGTCAGAATTTAGTCCATTTATATTTAAAGTTAATA 420  
 \*\*\*\*\*

III.1\_1 TTGTTATGTGTGAATTTGATCCTGTCATTATGATGTTAGCTGGTATTTTGTCTCATTAGTTGATGCAGTT 490  
 III.2\_1 TTGTTATGTGTGAATTTGATCCTGTCATTATGATGTTAGCTGGTATTTTGTCTCATTAGTTGATGCAGTT 490  
 III.2\_2 TTGTTATGTGTGAATTTGATCCTGTCATTATGATGTTAGCTGGTATTTTGTCTCATTAGTTGATGCAGTT 490  
 \*\*\*\*\*

III.1\_1 TCTTCCTAGTCTCGATGGTCTTTACATTTTGGCATGATTTTGCAGCGGCTGGTACCGGTTGTTCCTTTCC 560  
 III.2\_1 TCTTCCTAGTCTCGATGGTCTTTACATTTTGGCATGATTTTGCAGCGGCTGGTACCGGTTGTTCCTTTCC 560  
 III.2\_2 TCTTCCTAGTCTCGATGGTCTTTACATTTTGGCATGATTTTGCAGCGGCTGGTACCGGTTGTTCCTTTCC 560  
 \*\*\*\*\*

III.1\_1 ATGTTTAGCGCTTCCTTCAGGAGCTCTTTTAGGGCAGGCCTGGTGGTGACAAAATCTCTCAACATTTGCT 630  
 III.2\_1 ATGTTTAGCGCTTCCTTCAGGAGCTCTTTTAGGGCAGGCCTGGTGGTGACAAAATCTCTCAACATTTGCT 630  
 III.2\_2 ATGTTTAGCGCTTCCTTCAGGAGCTCTTTTAGGGCAGGCCTGGTGGTGACAAAATCTCTCAACATTTGCT 630  
 \*\*\*\*\*

III.1\_1 TGTCTATAAAGTATTTTATTTCTCCTTCACTTATGAAGCTTAGTTGGCTGGATATGAAATTCTGGGTTG 700  
 III.2\_1 TGTCTATAAAGTATTTTATTTCTCCTTCACTTATGAAGCTTAGTTGGCTGGATATGAAATTCTGGGTTG 700  
 III.2\_2 TGTCTATAAAGTATTTTATTTCTCCTTCACTTATGAAGCTTAGTTGGCTGGATATGAAATTCTGGGTTG 700  
 \*\*\*\*\*

III.1\_1 AAAATTCCTTTCTTTAAGAATGTTGAATATTGGCCCCACTCTCTCTGGCTTGTAGGGTTCTGCCGAG 770  
 III.2\_1 AAAATTCCTTTCTTTAAGAATGTTGAATATTGGTCCCACTCTCTCTGGCTTGTAGGGTTCTGCCGAG 770  
 III.2\_2 AAAATTCCTTTCTTTAAGAATGTTGAATATTGGCCCCACTCTCTCTGGCTTGTAGGGTTCTGCCGAG 770  
 \*\*\*\*\*

III.1\_1 AGATCCGCTGTTAGTCTGATGGGCTTTC---TGAGGGTAACCTTCCCTT--TGCTTGGCTGCCCTTAACA 840  
 III.2\_1 AGATCCGCTGTTAGTCTGATGGGCTTTCCTTTGAGGGTAACCCGACCTTTCTCTCTGGCTGCCCTTAACA 840  
 III.2\_2 AGATCCGCTGTTAGTCTGATGGGCTTTCCTTTGAGGGTAACCCGACCTTTCTCTCTGGCTGCCCTTAACA 840  
 \*\*\*\*\*

III.1\_1 TTTTTCCTTCATTTCAACTTTGGTGAATCTGACAATTATGTGTCTTGGAGTTGCTCTTCTCGAGGAGTA 910  
 III.2\_1 TTTTTCCTTCATTTCAACTTTGGTGAATCTGACAATTATGTGTCTTGGAGTTGCTCTTCTCGAGGAGTA 910  
 III.2\_2 TTTTTCCTTCATTTCAACTTTGGTGAATCTGACAATTATGTGTCTTGGAGTTGCTCTTCTCGAGGAGTA 910  
 \*\*\*\*\*

III.1\_1 TCTTTGTGGCGTTCTCTGTATTTCCCTGAATCTGAACGTTGGCCTGCCTTGCTAGATTGGGGAAGTTCTCC 980  
 III.2\_1 TCTTTGTGGCGTTCTCTGTATTTCCCTGAATCTGAACGTTGGCCTGCCTTGCTAGATTGGGGAAGTTCTCC 980  
 III.2\_2 TCTTTGTGGCGTTCTCTGTATTTCCCTGAATCTGAACGTTGGCCTGCCTTGCTAGATTGGGGAAGTTCTCC 980  
 \*\*\*\*\*

III.1\_1 TGGATAATATCCTGCAGAGTGTTCCTCAACTTGGTTCATTCTCCACATCACTTTCAGGTACACCAATCA 1050  
 III.2\_1 TGGATAATATCCTGCAGAGTGTTCCTCAACTTGGTTCATTCTCCACATCACTTTCAGGTACACCAATCA 1050  
 III.2\_2 TGGATAATATCCTGCAGAGTGTTCCTCAACTTGGTTCATTCTCCACATCACTTTCAGGTACACCAATCA 1050  
 \*\*\*\*\*

III.1\_1 GACGTAGATTTGGTCTTTTACATAGTCCCATATTTCTTGGAGGCTTTGCTCATTCTTTTTATTCTTTT 1120  
 III.2\_1 GACGTAGATTTGGTCTTTTACATAGTCCCATATTTCTTGGAGGCTTTGCTCATTCTTTTTATTCTTTT 1120  
 III.2\_2 GACGTAGATTTGGTCTTTTACATAGTCCCATATTTCTTGGAGGCTTTGCTCATTCTTTTTATTCTTTT 1120  
 \*\*\*\*\*

III.1\_1 TTCTCTAAACTTCCCTTCTCGCTTCATTTTCATTTTCATCTTCCATTGCTGATACCCTTCTTCCAGT 1190  
 III.2\_1 TTCTCTAAACTTCCCTTCTCGCTTCATTTTCATTTTCATCTTCCATTGCTGATACCCTTCTTCCAGT 1190  
 III.2\_2 TTCTCTAAACTTCCCTTCTCGCTTCATTTTCATTTTCATCTTCCATTGCTGATACCCTTCTTCCAGT 1190  
 \*\*\*\*\*

III.1\_1 TG----ATCGGCTCCTGAGGCTTGTGCATTCTTACGTAAGTTCTCGAGCCTTGGTTTTTCAGCTCCATCA 1260  
 III.2\_1 TGATCGCATCGGCTCCTGAGGCTTGTGCATTCTTACGTAAGTTCTCGAGCCTTGGTTTTTCAGCTCCATCA 1260  
 III.2\_2 TGATCGCATCGGCTCCTGAGGCTTGTGCATTCTTACGTAAGTTCTCGAGCCTTGGTTTTTCAGCTCCATCA 1260  
 \*\* \*\*\*\*\*

III.1\_1 GCTCCTTTAAGCACTTCTCTGTATTGGTTATTCTAGTTATACATTCTTCTAAATTTTTTTCAAAGTTTTT 1330  
 III.2\_1 GCTCCTTTAAGCACTTCTCTGTATTGGTTATTCTAGTTATACATTCTTCTAAATTTTTTTCAAAGTTTTT 1330  
 III.2\_2 GCTCCTTTAAGCACTTCTCTGTATTGGTTATTCTAGTTATACATTCTTCTAAATTTTTTTCAAAGTTTTT 1330  
 \*\*\*\*\*

III.1\_1 AACTTCTTTGCCTTTGGTTTGAATGTCCCTCCCGTAGCTCAGAGTAATTTGATCGTCTGAAGCCTTCTTCT 1400  
 III.2\_1 AACTTCTTTGCCTTTGGTTTGAATGTCCCTCCCGTAGCTCAGAGTAATTTGATCGTCTGAAGCCTTCTTCT 1400  
 III.2\_2 AACTTCTTTGCCTTTGGTTTGAATGTCCCTCCCGTAGCTCAGAGTAATTTGATCGTCTGAAGCCTTCTTCT 1400  
 \*\*\*\*\*

III.1\_1 CTCAGCTCATCAAAATCATTTCTCCATCCAGCTTTGTTCTGTTGCTGGTGAGGAACGCGTTCCTTTGGAG 1470  
 III.2\_1 CTCAGCTCATCAAAATCATTTCTCCATCCAGCTTTGTTCTGTTGCTGGTGAGGAACGCGTTCCTTTGGAG 1470  
 III.2\_2 CTCAGCTCATCAAAATCATTTCTCCATCCAGCTTTGTTCTGTTGCTGGTGAGGAACGCGTTCCTTTGGAG 1470  
 \*\*\*\*\*

III.1\_1 GAGGAGAGGCGCTCTGCGTTTTAGAGTTTCCAGTTTTTCTGTTCTGTTTTTTCCCATCTTTGTGGTTTT 1540  
 III.2\_1 GAGGAGAGGCGCTCTGCGTTTTAGAGTTTCCAGTTTTTCTGTTCTGTTTTTTCCCATCTTTGTGGTTTT 1540  
 III.2\_2 GAGGAGAGGCGCTCTGCGTTTTAGAGTTTCCAGTTTTTCTGTTCTGTTTTTTCCCATCTTTGTGGTTTT 1540  
 \*\*\*\*\*

III.1\_1 ATCTACTTTTGGTCTTTGATGATGGTGATGTACAGATGGGTTTTTGGTGTAGATGTCCTTTCTGGTTGTT 1610  
 III.2\_1 ATCTACTTTTGGTCTTTGATGATGGTGATGTACAGATGGGTTTTTGGTGTAGATGTCCTTTCTGGTTGTT 1610  
 III.2\_2 ATCTACTTTTGGTCTTTGATGATGGTGATGTACAGATGGGTTTTTGGTGTAGATGTCCTTTCTGGTTGTT 1610  
 \*\*\*\*\*

III.1\_1 AGTTTTCCTTCTAACAGACAGGA-CTTTTAACTCCACTGTCAACATTAGACAGATCAACGAGATAGAA 1680  
 III.2\_1 AGTTTTCCTTCTAACAGACAGGACCCCTTAAACACCCACTGTCAACATTAGACAGATCAACGAGACAGAA 1680  
 III.2\_2 AGTTTTCCTTCTAACAGACAGGACCCCTTAAACACCCACTGTCAACATTAGACAGATCAACGAGACAGAA 1680  
 \*\*\*\*\*

III.1\_1 AGTCAACAAGGATACCCAGGAATTGAACCTCAGCTCTGCACCAAGCAGACCTAATAGACATCTACAGAACT 1750  
 III.2\_1 AGTCAACAAGGATACCCAGGAATTGAACCTCAGCTCTGCACCAAGCAGACCTAATAGACATCTACAGAACT 1750  
 III.2\_2 AGTCAACAAGGATACCCAGGAATTGAACCTCAGCTCTGCACCAAGCAGACCTAATAGACATCTACAGAACT 1750  
 \*\*\*\*\*

III.1\_1 CTCCACCCCAAATCAACAGAATATACATTTTTTTTTCAGCACCACACCACCTATTCCAAAATTGACCACA 1820  
 III.2\_1 CTCCACCCCAAATCAACAGAATATACATTTTTTTTTCAGCACCACACCACCTATTCCAAAATTGACCACA 1820  
 III.2\_2 CTCCACCCCAAATCAACAGAATATACATTTTTTTTTCAGCACCACACCACCTATTCCAAAATTGACCACA 1820  
 \*\*\*\*\*

III.1\_1 TAGTTGGAAGTAAAGCTCTCCTCAGCAAATGTAAAAGAACAGAAATTATAACAACTATCTCTCAGACCA 1890  
 III.2\_1 TAGTTGGAAGTAAAGCTCTCCTCAGCAAATGTAAAAGAACAGAAATTATAACAACTATCTCTCAGACCA 1890  
 III.2\_2 TAGTTGGAAGTAAAGCTCTCCTCAGCAAATGTAAAAGAACAGAAATTATAACAACTATCTCTCAGACCA 1890  
 \*\*\*\*\*

III.1\_1 CAGTGCAATCAAACCTAGAACTCAGGATTAAGAATCTCACTCAAAGCCGCTCAACTACATGGAACCTGAAC 1960  
 III.2\_1 CAGTGCAATCAAACCTAGAACTCAGGATTAAGAATCTCACTCAAAGCCGCTCAACTACATGGAACCTGAAC 1960  
 III.2\_2 CAGTGCAATCAAACCTAGAACTCAGGATTAAGAATCTCACTCAAAGCCGCTCAACTACATGGAACCTGAAC 1960  
 \*\*\*\*\*

III.1\_1 AACCTGCTCCTGAATGACTACTGGGTACATAACGAAATGAAGGCAGAAATAAAGATGTTCTTTGAAACCA 2030  
 III.2\_1 AACCTGCTCCTGAATGACTACTGGGTACATAACGAAATGAAGGCAGAAATAAAGATGTTCTTTGAAACCA 2030  
 III.2\_2 AACCTGCTCCTGAATGACTACTGGGTACATAACGAAATGAAGGCAGAAATAAAGATGTTCTTTGAAACCA 2030  
 \*\*\*\*\*

III.1\_1 ACGAGAACAAGACACCACATACCAGAATCTCTGGGACGCATTCAAAGCAGTGTGTAGAGGGAAATTTAT 2100  
 III.2\_1 ACGAGAACAAGACACCACATACCAGAATCTCTGGGACGCATTCAAAGCAGTGTGTAGAGGGAAATTTAT 2100  
 III.2\_2 ACGAGAACAAGACACCACATACCAGAATCTCTGGGACGCATTCAAAGCAGTGTGTAGAGGGAAATTTAT 2100  
 \*\*\*\*\*

III.1\_1 AGCACTAAATGCCTAAGCAAGAAAGCAGGAAAGATCCAAAATTGACACCCCTAACATCACAATTTAAAAG 2170  
 III.2\_1 AGCACTAAATGCCTA--AAAGAGAAAGCAGGAAAGATCCAAAATTGACACCCCTAACATCACAATTTAAAAG 2170  
 III.2\_2 AGCACTAAATGCCTA--CAAGAGAAAGCAGGAAAGATCCAAAATTGACACCCCTAACATCACAATTTAAAAG 2170  
 \*\*\*\*\*

III.1\_1 AACTAGAAAAGCAAGAGCAAACACATTCAAAAGCTAGCAGAAGGCAAGAAATAACTAAAATCAGAGCAGA 2240  
 III.2\_1 AACTAGAAAAGCAAGAGCAAACACATTCAAAAGCTAGCAGAAGGCAAGAAATAACTAAAATCAGAGCAGA 2240  
 III.2\_2 AACTAGAAAAGCAAGAGCAAACACATTCAAAAGCTAGCAGAAGGCAAGAAATAACTAAAATCAGAGCAGA 2240  
 \*\*\*\*\*

III.1\_1 ACTGAAGGAAATAGAGACACAAAAACCCTTC--AAAAATCAATGAATCCAGGAGCTGGTTTTTTGAAAG 2310  
 III.2\_1 ACTGAAGGAAATAGAGACACAAAAACCCTTC--AAAAATCAATGAATCCAGGAGCTGGTTTTTTGAAAG 2310  
 III.2\_2 ACTGAAGGAAATAGAGACACAAAAACCCTTC--AAAAATCAATGAATCCAGGAGCTGGTTTTTTGAAAG 2310  
 \*\*\*\*\*

III.1\_1 GATCAA--AAAATTGATAGACCGCTAGCAAGACTAATAAAGAAAAAAGAGAGAAGAAATCAAATAGACACA 2380  
 III.2\_1 GATCAACAAAATTGATAGACCGCTAGCAAGACTAATAAAGAAAAAAGAGAGAAGAAATCAAATAGACACA 2380  
 III.2\_2 GATCAACAAAATTGATAGACCGCTAGCAAGACTAATAAAGAAAAAAGAGAGAAGAAATCAAATAGACACA 2380  
 \*\*\*\*\*

III.1\_1 ATAAAAAATGATAAAGGGGATATCACCACCGATCCCACAGAAATACAAACTACCATCAGAGAATACTACA 2450  
 III.2\_1 ATAAAAAATGATAAAGGGGATATCACCACCGATCCCACAGAAATACAAACTACCATCAGAGAATACTACA 2450  
 III.2\_2 ATAAAAAATGATAAAGGGGATATCACCACCGATCCCACAGAAATACAAACTACCATCAGAGAATACTACA 2450  
 \*\*\*\*\*

III.1\_1 AACACCTCTACGCAAATAAACTAGAAAATCTAGAAGAAATGGATACATTCCTCGACACATACACTCTCCC 2520  
 III.2\_1 AACACCTCTACGCAAATAAACTAGAAAATCTAGAAGAAATGGATACATTCCTCGACACATACACTCTCCC 2520  
 III.2\_2 AACACCTCTACGCAAATAAACTAGAAAATCTAGAAGAAATGGATACATTCCTCGACACATACACTCTCCC 2520  
 \*\*\*\*\*

III.1\_1 AAGACTAAACCAGGAAGAAGTTGAATCTCTGAATCGATCAATAACAGGCTCTGAAATTGTGGCAATAATC 2590  
 III.2\_1 AAGACTAAACCAGGAAGAAGTTGAATCTCTGAATCGATCAATAACAGGCTCTGAAATTGTGGCAATAATC 2590  
 III.2\_2 AAGACTAAACCAGGAAGAAGTTGAATCTCTGAATCGATCAATAACAGGCTCTGAAATTGTGGCAATAATC 2590  
 \*\*\*\*\*

III.1\_1 AATAGTTTACCAACCAAAAAGAGTCCAGGACCAGATGGATTTCACAGCCGAATTCTACCAGAGGTACAAGG 2660  
 III.2\_1 AATAGTTTACCAACCAAAAAGAGTCCAGGACCAGATGGATTTCACAGCCGAATTCTACCAGAGGTACAAGG 2660  
 III.2\_2 AATAGTTTACCAACCAAAAAGAGTCCAGGACCAGATGGATTTCACAGCCGAATTCTACCAGAGGTACAAGG 2660  
 \*\*\*\*\*

III.1\_1 AGGAACTGGTACCATTCTCTGAAACTATTCCAATCAATAGAAAAAGAGGGAATCCTCCCTAACTCATT 2730  
 III.2\_1 AGGAACTGGTACCATTCTCTGAAACTATTCCAATCAATAGAAAAAGAGGGAATCCTCCCTAACTCATT 2730  
 III.2\_2 AGGAACTGGTACCATTCTCTGAAACTATTCCAATCAATAGAAAAAGAGGGAATCCTCCCTAACTCATT 2730  
 \*\*\*\*\*

III.1\_1 TTATGAGGCCAGCATCATTCTGATACCAAAGCCGGGCAGAGACACAACCAAAAAAGAGAATTTAGACCA 2800  
 III.2\_1 TTATGAGGCCAGCATCATTCTGATACCAAAGCCGGGCAGAGACACAACCAAAAAAGAGAATTTAGACCA 2800  
 III.2\_2 TTATGAGGCCAGCATCATTCTGATACCAAAGCCGGGCAGAGACACAACCAAAAAAGAGAATTTAGACCA 2800  
 \*\*\*\*\*

III.1\_1 ATATCCTTGATGAACATTGATGCAAAAAATCCTCAATAAAAATACTGGCAAACCGAATC---CAGCACATCA 2870  
 III.2\_1 ATATCCTTGATGAACATTGATGCAAAAAATCCTCAATAAAAATACTGGCAAACCGAATC---CAGCACATCA 2870  
 III.2\_2 ATATCCTTGATGAACATTGATGCAAAAAATCCTCAATAAAAATACTGGCAAACCGAATC---CAGCACATCA 2870  
 \*\*\*\*\*

III.1\_1 AAAAGCTTATCCACCATGATCAAGTGGGCTTCAT-CCCTGGGATGCAAGGCTGGTTCATATACGCAAAAT 2940  
 III.2\_1 AAAAGCTTATCCACCATGATCAAGTGGGCTTCAT-CCCTGGGATGCAAGGCTGGTTCATATACGCAAAAT 2940  
 III.2\_2 AAAAGCTTATCCACCATGATCAAGTGGGCTTCAT-CCCTGGGATGCAAGGCTGGTTCATATACGCAAAAT 2940  
 \*\*\*\*\*

III.1\_1 CAATAAATGTAATCCAGCATATAAACAGAGCCAAAGACAAAAACCACATGATTATCTCAATAGATGCAGA 3010  
 III.2\_1 C---AATGTAATCCAGCATATAAACAGAGCCAAAGACAAAAACCACATGATTATCTCAATAGATGCAGA 3010  
 III.2\_2 CAATAAATGTAATCCAGCATATAAACAGAGCCAAAGACAAAAACCACATGATTATCTCAATAGATGCAG- 3010  
 \* \*\*\*\*\*

III.1\_1 AAAAGCCTTTGACAAAATCAACAACCCCTCATGCTAAAAACTCTCAATAAATTAGGTATTGATGGGACG 3080  
 III.2\_1 AAAAGCCTTTGACAAAATCAACAACCCCTCATGCTAAAAACTCTCAATAAATTAGGTATTGATGGGACG 3080  
 III.2\_2 AAAAGCCTTTGACAAAATCAACAACCCCTCATGCTAAAAACTCTCAATAAATTAGGTATTGATGGGACG 3080  
 \*\*\*\*\*

III.1\_1 TATTTCAAATAATAAGAGCTATCTATGACAAACCCACAGCCAATATCATACTGAATGGGCAAAAAGTGG 3150  
 III.2\_1 TATTTCAAATAATAAGAGCTATCTATGACAAACCCACAGCCAATATCATACTGAATGGGCAAAAAGTGG 3150  
 III.2\_2 TACTTCAAATAATAAGAGCTATCTATGACAAACCCACAGCCAATATCATACTGAATGGGCAAAAAGTGG 3150  
 \*\* \*\*\*\*\*

III.1\_1 AAGCATTCCCTTTGAAAACCGGCACAAGACAGGGATGCCCTCTCTCACCGCTCCTATTCAACATAGTGTT 3220  
 III.2\_1 AAGCATTCCCTTTGAAAACCGGCACAAGACAGGGATGCCCTCTCTCACCGCTCCTATTCAACATAGTGTT 3220  
 III.2\_2 AAGCATTCCCTTTGAAAACCGGCACAAGACAGGGATGCCCTCTCTCACCGCTCCTATTCAACATAGTGTT 3220  
 \*\*\*\*\*

III.1\_1 GGAAGTTCTGGCCAGGGCAATCAGGCAGGAGAAGGAAATAAAGGGTATTCAATTAGGAAAAGAGGAAAGTC 3290  
 III.2\_1 GGAAGTTCTGGCCAGGGCAATCAGGCAGGAGAAGGAAATAAAGGGTATTCAATTAGGAAAAGAGGAAAGTC 3290  
 III.2\_2 GGAAGTTCTGGCCAGGGCAATCAGGCAGGAGAAGGAAATAAAGGGTATTCAATTAGGAAAAGAGGAAAGTC 3290  
 \*\*\*\*\*

III.1\_1 AAATTGTCCTGTGTTGCAGACGACATGATTGTTTATCTAGAAAACCCCATCGTCTCAGCCCAAAATCTCC 3360  
 III.2\_1 AAATTGTCCTGTGTTGCAGACGACATGATTGTTTATCTAGAAAACCCCATCGTCTCAGCCCAAAATCTCC 3360  
 III.2\_2 AAATTGTCCTGTGTTGCAGACGACATGATTGTTTATCTAGAAAACCCCATCGTCTCAGCCCAAAATCTCC 3360  
 \*\*\*\*\*

III.1\_1 TTAAGCTGATAAGCAACTTCAGCAAAGTCTCAGGATACAAAATCAATGTACAAAATCACAAGCATCTCT 3430  
 III.2\_1 TTAAGCTGATAAGCAACTTCAGCAAAGTCTCAGGATACAAAATCAATGTACAAAATCACAAGCATCTCT 3430  
 III.2\_2 TTAAGCTGATAAGCAACTTCAGCAAAGTCTCAGGATACAAAATCAATGTACAAAATCACAAGCATCTCT 3430  
 \*\*\*\*\*

III.1\_1 ATACACCAACAACAGACAAAACAGAGAGCCAAATCATGGGTGAACTCCCATTCACAATTGCTTCAAAGAGA 3500  
 III.2\_1 ATACACCAACAACAGACAAAACAGAGAGCCAAATCATGGGTGAACTCCCATTCACAATTGCTTCAAAGAGA 3500  
 III.2\_2 ATACACCAACAACAGACAAAACAGAGAGCCAAATCATGGGTGAACTCCCATTCACAATTGCTTCAAAGAGA 3500  
 \*\*\*\*\*

III.1\_1 ATAAAATACCTAGGAATCCAACCTTACAAGGGATGTGAAGGACCTCTTCAAGGAGAACTACAACCCTGTC 3570  
 III.2\_1 ATAAAATACCTAGGAATCCAACCTTACAAGGGATGTGAAGGACCTCTTCAAGGAGAACTACAACCCTGTC 3570  
 III.2\_2 ATAAAATACCTAGGAATCCAACCTTACAAGGGATGTGAAGGACCTCTTCAAGGAGAACTACAACCCTGTC 3570  
 \*\*\*\*\*

III.1\_1 TCAAGGAAATAAAAGAGGAGACAAAACAAATGGAAGAACATTCATGCTCATGGGTAGGAAGAATCAATAT 3640  
 III.2\_1 TCAAGGAAATAAAAGAGGAGACAAAACAAATGGAAGAACATTCATGCTCATGGGTAGGAAGAATCAATAT 3640  
 III.2\_2 TCAAGGAAATAAAAGAGGAGACAAAACAAATGGAAGAACATTCATGCTCATGGGTAGGAAGAATCAATAT 3640  
 \*\*\*\*\*

III.1\_1 CGTGAAAATGGCCATACTGCCCAAGGTAATTTACAGATTCAATGCCATCCCCATCAAGCTACCAATGACT 3710  
 III.2\_1 CGTGAAAATGGCCATACTGCCCAAGGTAATTTACAGATTCAATGCCATCCCCATCAAGCTACCAATGACT 3710  
 III.2\_2 CGTGAAAATGGCCATACTGCCCAAGGTAATTTACAGATTCAATGCCATCCCCATCAAGCTACCAATGACT 3710  
 \*\*\*\*\*

III.1\_1 TTCTTACAGAAATTGGAAAAAACTACTTTAAAGTTCATATGGAACCAAAAAAGAGCCCGCATTGCCAAGT 3780  
 III.2\_1 TTCTTACAGAAATTGGAAAAAACTACTTTAAAGTTCATATGGAACCAAAAAAGAGCCCGCATTGCCAAGT 3780  
 III.2\_2 TTCTTACAGAAATTGGAAAAAACTACTTTAAAGTTCATATGGAACCAAAAAAGAGCCCGCATTGCCAAGT 3780  
 \*\*\*\*\*



III.1\_1 CAATCCTAAGCCAAAAGAACAAGCTGGAGGCATCACACTACCTGACTTCAAACATATACTACAAGGCTAC 3850  
 III.2\_1 CAATCCTAAGCCAAAAGAACAAGCTGGAGGCATCACACTACCTGACTTCAAACATATACTACAAGGCTAC 3850  
 III.2\_2 CAATCCTAAGCCAAAAGAACAAGCTGGAGGCATCACACTACCTGACTTCAAACATATACTACAAGGCTAC 3850  
 \*\*\*\*\*

III.1\_1 AGTAACCAAAACAGCATGGTACTGGTACCAAAACAGAGATATAGATCAATGGAACAGAACAGAGCCCTCA 3920  
 III.2\_1 AGTAACCAAAACAGCATGGTACTGGTACCAAAACAGAGATATAGATCAATGGAACAGAACAGAGCCCTCA 3920  
 III.2\_2 AGTAACCAAAACAGCATGGTACTGGTACCAAAACAGAGATATAGATCAATGGAACAGAACAGAGCCCTCA 3920  
 \*\*\*\*\*

III.1\_1 GAAATAATGCCGCATATCTACAACATCTGATCTTTGACAAACCTGAGAAAAACAAGCAATGGGGAAAGG 3990  
 III.2\_1 GAAATAATGCCGCATATCTACAACATCTGATCTTTGACAAACCTGAGAAAAACAAGCAATGGGGAAAGG 3990  
 III.2\_2 GAAATAATGCCGCATATCTACAACATCTGATCTTTGACAAACCTGAGAAAAACAAGCAATGGGGAAAGG 3990  
 \*\*\*\*\*

III.1\_1 ATTCCCTATTTAATAAATGGTGTGGGAAAACCTGGCTAGCCATATGTAGAAAAGCTGAAACTGGATCCCTT 4060  
 III.2\_1 ATTCCCTATTTAATAAATGGTGTGGGAAAACCTGGCTAGCCATATGTAGAAAAGCTGAAACTGGATCCCTT 4060  
 III.2\_2 ATTCCCTATTTAATAAATGGTGTGGGAAAACCTGGCTAGCCATATGTAGAAAAGCTGAAACTGGATCCCTT 4060  
 \*\*\*\*\*

III.1\_1 CCTTACACCTTATACAAAATCAATTCAAGATGGATTAAGATTTAAACGTTAAACTCAAACCATAAAA 4130  
 III.2\_1 CCTTACACCTTATACAAAATCAATTCAAGATGGATTAAGATTTAAACGTTAAACTCAAACCATAAAA 4130  
 III.2\_2 CCTTACACCTTATACAAAATCAATTCAAGATGGATTAAGATTTAAACGTTAAACTCAAACCATAAAA 4130  
 \*\*\*\*\*

III.1\_1 ACCCTAGAAGAAAACCTAGGCATTACCATTTCAGGACATAGGCGTGGGCAAGGACTTCATGTCCAAAACAC 4200  
 III.2\_1 ACCCTAGAAGAAAACCTAGGCATTACCATTTCAGGACATAGGCGTGGGCAAGGACTTCATGTCCAAAACAC 4200  
 III.2\_2 ACCCTAGAAGAAAACCTAGGCATTACCATTTCAGGACATAGGCGTGGGCAAGGACTTCATGTCCAAAACAC 4200  
 \*\*\*\*\*

III.1\_1 CAAAAGCAATGGCAACAAAAGACAAAATTGACAAATGGGATCTAATTAAACTAAAGAGCTTCTGCACAGC 4270  
 III.2\_1 CAAAAGCAATGGCAACAAAAGACAAAATTGACAAATGGGATCTAATTAAACTAAAGAGCTTCTGCACAGC 4270  
 III.2\_2 CAAAAGCAATGGCAACAAAAGACAAAATTGACAAATGGGATCTAATTAAACTAAAGAGCTTCTGCACAGC 4270  
 \*\*\*\*\*

III.1\_1 AAAAGAACTACCATCAGAGTGAACAGGCAACCTACAACATGGGAGAAAATTTTTGCAACCTACTCATCT 4340  
 III.2\_1 AAAAGAACTACCATCAGAGTGAACAGGCAACCTACAACATGGGAGAAAATTTTTGCAACCTACTCATCT 4340  
 III.2\_2 AAAAGAACTACCATCAGAGTGAACAGGCAACCTACAACATGGGAGAAAATTTTTGCAACCTACTCATCT 4340  
 \*\*\*\*\*

III.1\_1 GACAAAGGGCTAATATCCAGAATCTACAATGAACCTCAAACAAATTTACAAGAAAAAACAACAACCCCA 4410  
 III.2\_1 GACAAAGGGCTAATATCCAGAATCTACAATGAACCTCAAACAAATTTACAAGAAAAAACAACAACCCCA 4410  
 III.2\_2 GACAAAGGGCTAATATCCAGAATCTACAATGAACCTCAAACAAATTTACAAGAAAAAACAACAACCCCA 4410  
 \*\*\*\*\*

III.1\_1 TCAAAAAGTGGGCGAAGGACATGAACAGACACTTCTCAAAAAGAAGACATTTATGCAGCCAAAAACACAT 4480  
 III.2\_1 TCAAAAAGTGGGCGAAGGACATGAACAGACACTTCTCAAAAAGAAGACATTTATGCAGCCAAAAACACAT 4480  
 III.2\_2 TCAAAAAGTGGGCGAAGGACATGAACAGACACTTCTCAAAAAGAAGACATTTATGCAGCCAAAAACACAT 4480  
 \*\*\*\*\*

III.1\_1 GAAGAAATGCTCATCATCACTGGCCATCAGAGAAATGCAAAATCAAACCCTATGAGATATCATCTCACA 4550  
 III.2\_1 GAAGAAATGCTCATCATCACTGGCCATCAGAGAAATGCAAAATCAAACCCTATGAGATATCATCTCACA 4550  
 III.2\_2 GAAGAAATGCTCATCATCACTGGCCATCAGAGAAATGCAAAATCAAACCCTATGAGATATCATCTCACA 4550  
 \*\*\*\*\*

III.1\_1 CCAGTTAGAAATGGCAATCATTTAAAAGTCAGGAAACAACAGGTGCTGGAGAGGATGCGGAGAAAATAGGAA 4620  
 III.2\_1 CCAGTTAGAAATGGCAATCATTTAAAAGTCAGGAAACAACAGGTGCTGGAGAGGATGCGGAGAAAATAGGAA 4620  
 III.2\_2 CCAGTTAGAAATGGCAATCATTTAAAAGTCAGGAAACAACAGGTGCTGGAGAGGATGCGGAGAAAATAGGAA 4620  
 \*\*\*\*\*

III.1\_1 CACTTTTACACTGTTGGTGGGACTGTAAACTAGTTCAACCATTGTGGAAGTCAGTGTGGCGATTCCCTCAG 4690  
 III.2\_1 CACTTTTACACTGTTGGTGGGACTGTAAACTAGTTCAACCATTGTGGAAGTCAGTGTGGCGATTCCCTCAG 4690  
 III.2\_2 CACTTTTACACTGTTGGTGGGACTGTAAACTAGTTCAACCATTGTGGAAGTCAGTGTGGCGATTCCCTCAG 4690  
 \*\*\*\*\*

III.1\_1 GGATCTAGAACTAGAAAATACCATTGACCCAGCCATCCCATTACTGGGTATATACCCAAATGAGTATAAA 4760  
 III.2\_1 GGATCTAGAACTAGAAAATACCATTGACCCAGCCATCCCATTACTGGGTATATACCCAAATGAGTATAAA 4760  
 III.2\_2 GGATCTAGAACTAGAAAATACCATTGACCCAGCCATCCCATTACTGGGTATATACCCAAATGAGTATAAA 4760  
 \*\*\*\*\*

III.1\_1 TCATGCTGCTATAAAGACACATGCACACGATGTTTATTGCGGCCTATTCAACAATAGCAAAGACTTGGGA 4830  
 III.2\_1 TCATGCTGCTATAAAGACACATGCACACGATGTTTATTGCGGCCTATTCAACAATAGCAAAGACTTGGGA 4830  
 III.2\_2 TCATGCTGCTATAAAGACACATGCACACGATGTTTATTGCGGCCTATTCAACAATAGCAAAGACTTGGGA 4830  
 \*\*\*\*\*

```

III.1_1 ACCAACCCAAATGTCCAACAATGATAGACTGGATTAAGAAAATGTGGCACATATACACCATGGAATACTA 4900
III.2_1 ACCAACCCAAATGTCCAACAATGATAGACTGGATTAAGAAAATGTGGCACATATACACCATGGAATACTA 4900
III.2_2 ACCAACCCAAATGTCCAACAATGATAGACTGGATTAAGAAAATGTGGCACATATACACCATGGAATACTA 4900
*****

III.1_1 TGCAGCCATAAAAAATGATGAGTTCATATCCTTTGTAGGGACATGGATG-AAATTGGAAACCATCATTTCT 4970
III.2_1 TGCAGCCATAAAAAATGATGAGTTCATATCCTTTGTAGGGACATGGATGAAAATTGGAAATCATCATTTCT 4970
III.2_2 TGCAGCCATAAAAAATGATGAGTTCATATCCTTTGTAGGGACATGGATG-AAATTGGAAACCATCATTTCT 4970
*****

III.1_1 CAGCAAATATCGCAAGAACAACAAAAACCAAACACCGCATATTCTACTCATAGGTGGGAATTGAACAATG 5040
III.2_1 CAGTAAATATCGCAAGAACAACAAAAACCAAACACCGCATATTCTACTCATAGGTGGGAATTGAACAATG 5040
III.2_2 CAGTAAATATCGCAAGAACAACAAAAACCAAACACCGCATATTCTACTCATAGGTGGGAATTGAACAATG 5040
*** *****

III.1_1 AGATCACATGGACCAGGAAGGGGAACATCACACTCTGGGGACT-GTGGT-GGGCCGGGGGAGGGGGGAG 5110
III.2_1 AGATCACATGGACCAGGAAGGGGAATATCACACTCTGGGGACT-GTGGTGGGGTC-GGGAGGGGGGAG 5110
III.2_2 AGAT--CATGGACCAGGAAGGGGAATATCACACTCTGGGGACTGGGGTGGGGTGGGGGAGGGGGGAG 5110
**** *****

III.1_1 GGATAGCATTTGGGAGATATACCTAATGCTAGATGACACATTAGTGGGTGCAGCGCACCAGCATGGGCAT 5180
III.2_1 GGATAGCATTTGGGAGATATACCTAATGCTAGATGACACATTAGTGGGTGCAGCGCACCAGCATGGGCAT 5180
III.2_2 GGATAGCATTTGGGAGATATACCTAATGCTAGATGACACATTAGTGGGTGCAGCGCACCAGCATGGGCAT 5180
*****

III.1_1 GTATACATATGTAACCTAACCTGCACAATGTGCACATGTACCCTAAAACCTTAGAGTATAAT--AAAAAAA 5250
III.2_1 GTATACATATGTAACCTAACCTGCACAATGTGCACATGTACCCTAAAACCTTAGAGTATAAT--AAAAAAA 5250
III.2_2 GTATACATATGTAACCTAACCTGCACAATGTGCACATGTACCCTAAAACCTTAGAGTATAATAAAAAAA 5250
*****

III.1_1 AAAAAAAAAAATAGAAAGAAAGAAATAAAT--AAAAAAA-GAAAAGAAAGAAAGAAAGAAAGAAAGAAA 5320
III.2_1 AAAAAAAAAAATAGAAAGAAAGAAATAAAT--AAAAAGAAAGAAA-GAAAGAAAGAAAGAAAGAAAGAAA 5320
III.2_2 AAAAAAAAAAATAGAAAGAAAGAAATAAATAAAAAAGAAAGAAA-GAAAGAAAGAAAGAAAGAAAGAAA 5320
*****

III.1_1 GAAAGAAAGAAAGAAAGAAAGAAAGAAAGAAAGAAAGAAAGAAAGAAAGAAAGAAAGAGAAAAGCAAAT 5390
III.2_1 GAAAGAAAGAAAGAAAGAAAGAAAGAAAGAAAGAAAGAAAGAAAGAAAGAAAGAAAGAGAAAAGCAAAT 5390
III.2_2 GAAAGAAAGAAAG--AAGAAAGAAAGAAAGAAAGAAAGAAAGAAAGAAAGAAAGAAAGAGAAAAG--AAAT 5390
*****

III.1_1 GTCTATTCCGGCTCATTGCCTATTTTTT-GAATTTGGATTTT-GTTTTCTTGCTATTGAGTTGTTTGAGT 5460
III.2_1 GTCTATTCCGGCTCATTGCCTATTTTTT-GAATTTGGATTTTGGTTTTCTTGCTATTGAGTTGTTTGAGT 5460
III.2_2 GTCTATT-CAGTCTATTGCCTATTTTTTGGAAATTTGGATTTTGGTTTTCTTGCTATTGAGTTGTTTGAGT 5460
*****

III.1_1 TCTTTATATATTTTGGAGTAATACTCCTTATCAGATGTATGCTTTGCAAATAAAA-TTTCCATTCCATGC 5530
III.2_1 TCCTTATATATTTTGGAGTAATACTCCTTATCAGATGTATGCTTTGCAAATAAAA-TTTCCATTCCATGC 5530
III.2_2 TCCTTATATATTTTGGAGTAATACTCCTTATCAGATGTATGCTTTGCAAATAAAA-TTTCCATTCCATGC 5530
** *****

III.1_1 -----AAAAAAAAAAAAAAAAAAAAAAAAAAAAAAAAAAAAAAAAAGAAATGAGAGAATA 5590
III.2_1 -----AAAAAAAAAAAAAAAAAAAAAAAAAAAAAAAAAAAAAAAAAGAAATGAGAGAATA 5590
III.2_2 AAAAAAAAAAAAAAAAAAAAAAAAAAAAAAAAAAAAAAAAAAGAAATGAGAGAATA 5590
*****

```

The multiple sequence alignment was used construct a consensus sequence of the LINE-1 insertion in RP1 exon 4 of patients III.1 and III.2.

```

>RP1_exon4_LINE1_consensus_sequence
GTggGGTGTAAAGTCTCCATTATTAAtgtgTGGGAGTCTAAGTCTCTTTGTAGGTCACCTGAGGACTTGC
TTTATGAATCTGGGTGCTCCTGTATTGGGTGCATAAATATTTAGGATAGTTAGCTCCTCTTGTTGAATTGA
TCCCTTTACCATTATGTAATGGCCTTCTTTGTCTCTTTTGATCTTTGTTGGTTTAAAGTCTGTTTTATCAG
AGACTAGGATTGCAACCCCTGCCTTTTTTTGTTTTCCATTGGCTTGGTAGATCTTCTCCATCCTTTTTATT
TTGAGCCTATGTGTGCTCTGCACGTGAGATgggTtccctGAATACAGCACACTGATGGGTCTTGACTCTT
TATCCAACCTGCCAGTCTGTGCTTTTAATTGCAGAATTTAGTCCATTTATATTTAAAGTTAATATTGTTA
TGTGTGAATTTGATCCTGTCAATTATGATGTTAGCTGGTGAATTTGCTCATTAGTTGATGCAGTTTCTTCT
AGTCTCGATGGTCTTTACATTTTGGCATGATTTTGCAGCGGCTGGTACCGGTTGTTCCCTTTCCATGTTT
AGCTTCCCTCAGGAGCTCTTTTAGGGCAGGCCTGGTGGTGACAAAATCTCTCAACATTTGCTTGTCTATAA
AGTATTTTATTTCTCCTTCACTTATGAAGCTTAGTTTGGCTGGATATGAAATTTCTGGGTGAAAATTTCTTT

```

TCTTTAAGAATGTTGAATATTGGcCCCCACTCTCTTCTGGCTTGTAGGGTTTCTGCCGAGAGATCCGCTGT  
TAGTCTGATGGGCTTTCcttTGAGGGTAACCcgaCCTTtctctcGGCTGCCCTTAACATTTTTTCCTTCA  
TTTTCACTTTGGTGAATCTGACAATTATGTGTCTTGGAGTTGcTCTTCTCGAGGAGTATCTTTGTGGCGTT  
CTCTGTATTTTCTGAATCTGAACGTTGGCCTGCCTTGTAGATTGGGGAAGTTCTCTGGATAATATCCTG  
CAGAGTGTTCCTCAACTTGGTTCATTCTCCACATCACTTTCAGGTACACCAATCAGACGTAGATTTGGTC  
TTTTCACATAGTCCCATATTTCTTGGAGGCTTTGCTCATTCTTTTTTATTCTTTTTTCTCTAAACTTCCCT  
TCTCGCTTCATTTCACTTCATTCTCTTCCATTGCTGATACCCTTTCTTCCAGTTGatcgATCGGCTCCT  
GAGGCTTcTGCATTCTTCACGTAGTTCTCGAGCCTTGGTTTTTCAGCTCCATCAGCTCCTTTAAGCACTTCT  
CTGTATTGGTTATTCTAGTTATACATTCTTCTAAATTTTTTCAAAGTTTTCAACTTCTTTGCCTTTGGTT  
TGAATGTCCTCCCGTAGCTCAGAGTAATTTGATCGTCTGAAGCCTTCTTCTCTCAGCTCATCAAATCATT  
CTCCATCCAGCTTTGTTCTGTTGCTGGTGGGAACTGCGTTCCTTTGGAGGAGGAGAGGCGCTCTGCGTTT  
TAGAGTTTCCAGTTTTTCTGTTCTGTTTTTCCCCATCTTTGTGGTTTTATCTACTTTTGGTCTTTGATGA  
TGGTGATGTACAGATGGGTTTTcGGTGTAGATGTCCTTTCTGGTTGTTAGTTTTCTTCTAACAGACAGGA  
cCcTTAACACcCCACTGTCAACATTAGACAGATCAACGAGAcAGAAAGTCAACAAGGATACCCAGGAATT  
GAACTCAGCTCTGCACCAAGCAGACCTAATAGACATCTACAGAACTCTCCACCCCAAATCAACAGAATATA  
CATTTTTTTTTCAGCACCACACCACACCTATTCCAAAATTGACCACATAGTTGGAAGTAAAGCTCTCCTCAGC  
AAATGTAAAAGAACAGAAATTATAACAACTATCTCTCAGACCACAGTGAATCAAACCTAGAACTCAGGAT  
TAAGAATCTCACTCAAAGCCGCTCAACTACATGGAACCTGAACAACCTGCTCCTGAATGACTACTGGGTAC  
ATAACGAAATGAAGGCAGAAATAAAGATGTTCTTTGAAACCAACGAGAACAAGACACCACATACCAGAAT  
CTCTGGGACGCATTCAAAGCAGTGTGTAGAGGGAAATTTATAGCACTAAATGCCTAcAAGAGAAAGCAGGA  
AAGATCCAAAATTGACACCCTAACATCACAATTAAGAAGAACTAGAAAAGCAAGAGCAAACACATTCAAAAG  
CTAGCAGAAGGCAAGAAATAACTAAAATCAGAGCAGAACTGAAGGAAATAGAGACACAAAAACCTTCAA  
AAAAATCAATGAATCCAGGAGCTGGTTTTTTTTGAAAGGATCAAcAAAATTGATAGACCGCTAGCAAGACTAAT  
AAAGAAAAAAGAGAGAAGAATCAAATAGACACAATAAAAAATGATAAAGGGGATATCACCACCGATCCCA  
CAGAAATACAACTACCATCAGAGAATACTACAAACACCTCTACGCAAATAAACTAGAAAATCTAGAAGAA  
ATGGATACATTCCTCGACACATACACTCTCCCAAGACTAAACCAGGAAGAAGTTGAATCTCTGAATCGAcC  
AATAACAGGCTCTGAAATTGTGGCAATAATCAATAGTTTACCAACCAAAAAGAGTCCAGGACCAGATGGAT  
TCACAGCCGAATTCTACCAGAGGTACAAGGAGGAACTGGTACCATTCTTCTGAAACTATTCCAATCAATA  
GAAAAAGAGGGAATCCTCCCTAACTCATTTTTATGAGGCCAGCATCATTCTGATACCAAAAGCCGGGCAGAGA  
CACAACCAAAAAGAGAATTTTAGACCAATATCCTTGATGAACATTGATGCAAAAAATCCTCAATAAAATAC  
TGGCAAAACCGAATCcagCAGCACATCAAAAAGCTTATCCACCATGATCAAGTGGGCTTCATCCCTGGGATG  
CAAGGCTGGTTCAATATACGCAAAATCaataAATGTAATCCAGCATATAAACAGAGCCAAAGACAAAAACCA  
CATGATTATCTCAATAGATGCAGaAAAAGCCTTTGACAAAAATCAACAACCCTTCATGCTAAAAACTCTCA  
ATAAATTAGGTATTGATGGGACGTatTTCAAATAATAAGAGCTATCTATGACAAAACCCACAGCCAATATC  
ATACTGAATGGGCAAAAACCTGGAAAGCATTCCCTTTGAAAACCGGCACAAGACAGGGATGCCCTCTCTCACC  
GCTCCTATTCAACATAGTGTGGAAAGTTCTGGCCAGGGCAATCAGGCAGGAGAAGGAAAATAAAGGGTATTC  
AATTAGGAAAAGAGGAAGTCAAAATGTCCCTGTTTGAGACGACATGATTGTTTATCTAGAAAACCCCATC  
GTCTCAGCCAAAATCTCCTTAAGCTGATAAGCAACTTCAGCAAAGTCTCAGGATACAAAATCAATGTACA  
AAAATCACAAGCATTCTTATACCAACAACAGACAAAACAGAGAGCCAAATCATGgGTGAACCTCCATTCA  
CAATTGCTTCAAAGAGAATAAAAATACCTAGGAATCCAACCTTACAAGGGATGTGAAGGACCTCTTCAAGGAG  
AACTACAAACCACTGCTCAAGGAAAATAAAGAGGAGACAAAACAATGGAAGAACATTCATGCTCATGGGT  
AGGAAGAATCAATATCGTGAAAAATGGCCATACTGCCCAAGGTAATTTACAGATTCAATGCCATCCCCATCA  
AGCTACCAATGACTTTCTTACAGAATTGGAAAAACTACTTTAAAGTTTCAATATGGAACCAAAAAGAGCC  
CGCATTGCCAAGTCAATCCTAAGCCAAAAGAACAAGCTGGAGGCATCACACTACCTGACTTCAAACCTATA  
CTACAAGGCTACAGTAACCAAAAACAGCATGGTACTGGTACCAAAACAGAGATATAGATCAATGGAACAGAA  
CAGAGCCCTCAGAAATAATGCCGCATATCTACAACCTATCTGATCTTTGACAAACCTGAGAAAAACAAGCAA  
TGGGGAAAGGATTCCTATTTAATAAATGGTGTGGGAAAACCTGGCTAGCCATATGTAGAAAGCTGAAACT  
GGATCCCTTCTTACACCTTATACAAAATCAATTCAAGATGGATTAAAGATTTAAACGTTAAACctAAAA  
CCATAAAAACCCCTAGAAGAAAACCTAGGCATTACCATTGAGGACATAGGCGTGGGCAAGGACTTCATGTCC  
AAAACACCAAAAAGCAATGGCAACAAAAGACAAAATTTGACAAAATGGGATCTAATTTAAACTAAAGAGCTTCTG  
CACAGCAAAAAGAACTACCATCAGAGTGAACAGGCAACCTACAACATGGGAGAAAAATTTTTGCAACCTACT  
CATCTGACAAAGGGCTAATATCCAGAATCTACAATGAACTCAAACAATTTACAAGAAAAAACAACAAC  
CCCATCAAAAAGTGGGCGAAGGACATGAACAGACACTTCTCAAAGAAGACATTTATGCAGCCAAAAAACA  
CATGAAGAAATGCTCATCATCACTGGCCATCAGAGAAATGCAAATCAAACCCTATGAGATATCATCTCA  
CACCAGTTAGAATGGCAATCATTA AAAAGTCAAGGAAACAACAGGTGCTGGAGAGGATGCGGAGAAATAGGA  
ACACTTTTACACTGTTGGTGGGACTGTAAACTAGTTCAACCATTGTGGAAGTCAAGTGGCGATTCTCAG  
GGATCTAGAACTAGAAATACCATTTGACCCAGCCATCCATTACTGGGTATATACCCAAATGAGTATAAAT  
CATGCTGTATAAAGACACATGCACACGTATGTTTATTGCGGCACTATTCCAAATAGCAAAGACTTGGAAAC

CAACCCAAATGTCCAACAATGATAGACTGGATTAAGAAAATGTGGCACATATACACCATGGAATACTATGC  
AGCCATAAAAAATGATGAGTTCATATCCTTTGTAGGGACATGGATGAAATTGGAAAACATCATTCTCAGtA  
AACTATCGCAAGAACAACAAAAACCAAACACCGCATATTCTCACTCATAGGTGGGAATTGAACAATGAGATca  
CATGGACCCAGGAAGGGGAAtATCACACTCTGGGGACTGtGGTgGGGtCgGGGGAGGGGGAGGGATAGCA  
TTGGGAGATATACCTAATGCTAGATGACACATTAGTGGGTGCAGCGCACCAGCATGGCACATGTATACATA  
TGTAACCTAACCTGCACAATGTGCACATGTACCCTAAAACTTAGAGTATAATaAAAAAAAAAAAAAAAAAAAA  
TAGAAAGAAAGAAATAAATaAAAAgAAaGAAAGAAAGAAAGAAAGAAAGAAAGAAAGAAAGAAAGAAAGaA  
AGAAAGAAAGAAAGAAAGAAAGAAAGAAAGAAAGAAAGAAAGAAAGAAAGAAAGAAAGAAAGAAAGAAAG  
AATAActCCTTATCAGATGTATGCTTTGCAAATAAATTTcCCATTCCATGCaaaaaAAAAAAAAAAAAAA  
AAAAAAAAAAAAAAAAAAAAAAAAAAGAATGAGAGAATA
