# Supplementary material for: Characterisation of a LINE-1 Insertion in the RP1 Gene by Targeted Adaptive Nanopore Sequencing in a Family with Retinitis Pigmentosa
Source: Hindawi journal article supplement (doi:10.1155/2024/6580561), 2024-02-09
Supplement: f3 [file 6580561.f3.pdf]

**Supplementary Table S1. Genetic positions and overlapping genes included in the custom target panel for targeted adaptive nanopore sequencing**

| Chromosome | Start position | End position | Genes overlapping with the position                                                              |
|------------|----------------|--------------|--------------------------------------------------------------------------------------------------|
| chr1       | 908923         | 959575       | LINC02593;SAMMD11;NOC2L                                                                          |
| chr1       | 1497162        | 1549685      | ATAD3B;ATAD3A;TMEM240                                                                            |
| chr1       | 2388964        | 2428797      | MORN1;RER1;PEX10                                                                                 |
| chr1       | 5847811        | 6007473      | MIR4689;NPHP4                                                                                    |
| chr1       | 6409776        | 6476367      | HES2;MIR4252;ESPN;TNFRSF25                                                                       |
| chr1       | 8337397        | 8863921      | SLC45A1;RERE;RERE-AS1;SNORD128                                                                   |
| chr1       | 9928428        | 10000501     | LZIC;TMEM274P;MIR5697;NMNAT1                                                                     |
| chr1       | 10457288       | 10645758     | DFFA;PEX14                                                                                       |
| chr1       | 11258198       | 11311049     | MTOR;UBIAD1                                                                                      |
| chr1       | 11965181       | 12030211     | PLOD1;MFN2;MIR6729                                                                               |
| chr1       | 16109337       | 16171069     | EPHA2                                                                                            |
| chr1       | 16725273       | 17026928     | RNVU1-18;RNU1-3;RNU1-4;RNU1-2;RNU1-1;MST1L;MIR3675;LOC112267871;LOC105376805;CROCC;MFAP2;ATP13A2 |
| chr1       | 19200660       | 19266552     | UBR4;EMC1-AS1;EMC1;MRTO4                                                                         |
| chr1       | 20013179       | 20106911     | PLA2G5                                                                                           |
| chr1       | 26417282       | 26486306     | LIN28A;LOC101928324;DHDDS;HMGN2                                                                  |
| chr1       | 36080239       | 36140222     | TEKT2;ADPRHL2;COL8A2;TRAPPC3                                                                     |
| chr1       | 40057710       | 40112260     | CAP1;PPT1                                                                                        |
| chr1       | 40285489       | 40332813     | ZMPSTE24;COL9A2                                                                                  |
| chr1       | 42718093       | 42755254     | CLDN19                                                                                           |
| chr1       | 42910353       | 42973893     | SLC2A1                                                                                           |
| chr1       | 43348398       | 43383074     | MPL;CDC20;MIR6734;ELOVL1                                                                         |
| chr1       | 43931950       | 43983022     | ARTN;IPO13;DPH2;ATP6V0B                                                                          |
| chr1       | 45485300       | 45528382     | TESK2;CCDC163;MMACHC;PRDX1                                                                       |
| chr1       | 46173683       | 46235305     | PIK3R3;LOC110117498-PIK3R3;P3R3URF;TSPAN1;POMGNT1;LURAP1                                         |
| chr1       | 47401285       | 47433052     | FOXE3                                                                                            |
| chr1       | 58560433       | 58592252     | TACSTD2                                                                                          |

|      |           |           |                                             |
|------|-----------|-----------|---------------------------------------------|
| chr1 | 63307567  | 63340128  | LINC00466;FOXD3-AS1;FOXD3;MIR6068           |
| chr1 | 68413822  | 68464954  | RPE65                                       |
| chr1 | 93977834  | 94136148  | ABCA4                                       |
| chr1 | 97062743  | 98010000  | DPYD-AS1;DPYD-AS2;DPYD;LINC01930            |
| chr1 | 102861467 | 103123872 | COL11A1                                     |
| chr1 | 108119043 | 108215849 | SLC25A24                                    |
| chr1 | 108866885 | 108978527 | GP2SM2;CLCC1                                |
| chr1 | 109533615 | 109634929 | GPR61;MIR197;GNAI3;GNAT2;AMPD2              |
| chr1 | 110044870 | 110085672 | STRIP1;ALX3                                 |
| chr1 | 111102163 | 111155203 | DRAM2                                       |
| chr1 | 119896553 | 120115779 | NOTCH2                                      |
| chr1 | 145896350 | 145933717 | ITGA10;PEX11B;GNRHR2;RBM8A                  |
| chr1 | 147887795 | 147924269 | GJA8                                        |
| chr1 | 150306479 | 150368233 | MRPS21;PRPF3                                |
| chr1 | 150534369 | 150575937 | MIR4257;ADAMTSL4;ADAMTSL4-AS1               |
| chr1 | 155595205 | 155629951 | MSTO2P;MSTO1                                |
| chr1 | 156132366 | 156192752 | LMNA;SEMA4A                                 |
| chr1 | 160261807 | 160301348 | DCAF8;LOC100287049;PEX19                    |
| chr1 | 161182104 | 161229723 | ADAMTS4;NDUFS2;FCER1G;APOA2;MIR5187;TOMM40L |
| chr1 | 161751298 | 161992574 | DUSP12;ATF6                                 |
| chr1 | 171620417 | 171667688 | MYOCOS;MYOC                                 |
| chr1 | 185719391 | 186205949 | HMCN1                                       |
| chr1 | 196636754 | 196767476 | CFH                                         |
| chr1 | 197253204 | 197493455 | CRB1                                        |
| chr1 | 202925826 | 202973572 | KLHL12;ADIPOR1;CYB5R1                       |
| chr1 | 211461522 | 211507162 | RD3                                         |
| chr1 | 211643657 | 211690630 | LINC01693;NEK2;LOC91548                     |
| chr1 | 212609474 | 212641775 | ATF3;FAM71A                                 |

|       |           |           |                                         |
|-------|-----------|-----------|-----------------------------------------|
| chr1  | 212843275 | 212914363 | SPATA45;FLVCR1-DT;FLVCR1                |
| chr1  | 215607891 | 216438448 | KCTD3;LOC102723833;USH2A                |
| chr1  | 220133293 | 220287529 | IARS2;MIR664A;SNORA36B;AURKAP1;RAB3GAP2 |
| chr1  | 223764893 | 223860954 | CAPN2;TP53BP2                           |
| chr1  | 235432190 | 235519452 | TBCE;B3GALNT2                           |
| chr1  | 235646041 | 235898640 | GNG4;MIR1537;LYST                       |
| chr1  | 243241034 | 243515091 | CEP170;MIR4677;SDCCAG8                  |
| chr1  | 248308630 | 248339568 | OR2M7                                   |
| chr10 | 1034538   | 1147384   | IDI2-AS1;IDI1;WDR37                     |
| chr10 | 7688316   | 7764520   | ITIH2                                   |
| chr10 | 13084449  | 13153308  | CCDC3;OPTN                              |
| chr10 | 13262796  | 13317412  | PHYH                                    |
| chr10 | 16808966  | 17144811  | RSU1;CUBN                               |
| chr10 | 17213241  | 17252593  | VIM-AS1;VIM                             |
| chr10 | 24833614  | 24967606  | PRTFDC1                                 |
| chr10 | 27095111  | 27258046  | ANKRD26;YME1L1;MASTL;ACBD5;LRRC37A6P    |
| chr10 | 27489174  | 27558207  | RAB18                                   |
| chr10 | 30294801  | 30389448  | MTPAP;MIR7162;GOLGA2P6                  |
| chr10 | 31303495  | 31544814  | ZEB1-AS1;LOC100505502;ZEB1              |
| chr10 | 49439168  | 49554538  | PGBD3;ERCC6                             |
| chr10 | 53787771  | 55642942  | MIR548F1;LOC105378311;PCDH15;MTRNR2L5   |
| chr10 | 68215595  | 68247113  | ATOH7                                   |
| chr10 | 69254984  | 69416884  | HKDC1;HK1;TACR2                         |
| chr10 | 71381920  | 71830947  | CDH23-AS1;CDH23;C10orf105;VSIR;MIR7152  |
| chr10 | 74809927  | 75047624  | LOC101929165;SNORD172;KAT6B             |
| chr10 | 75416624  | 76575168  | MIR606;LOC105378367;LRMDA               |
| chr10 | 84179537  | 84274960  | C10orf99;CDHR1;LRIT2;LRIT1;RGR          |
| chr10 | 86741601  | 86947825  | BMPR1A                                  |

|       |           |           |                                            |
|-------|-----------|-----------|--------------------------------------------|
| chr10 | 89415299  | 89571641  | IFIT5;SLC16A12-AS1;SLC16A12                |
| chr10 | 92559105  | 92670395  | IDE;KIF11                                  |
| chr10 | 93576687  | 93681010  | FFAR4;RBP4;PDE6C                           |
| chr10 | 95590941  | 95709143  | ALDH18A1;TCTN3                             |
| chr10 | 100720396 | 100844944 | PAX2                                       |
| chr10 | 100992679 | 101047295 | TWNK;LZTS2;PDZD7;SFXN3                     |
| chr10 | 102215186 | 102256512 | ELOVL3;PITX3                               |
| chr10 | 102658731 | 102729397 | ARL3                                       |
| chr10 | 110883730 | 110934201 | MIR4680;PDCD4;BBIP1                        |
| chr10 | 117113521 | 117153301 | SHTN1;VAX1                                 |
| chr10 | 122439653 | 122529907 | PLEKHA1;ARMS2;HTRA1                        |
| chr10 | 124382303 | 124433976 | OAT                                        |
| chr10 | 127722185 | 127756183 | FOXI2                                      |
| chr11 | 1737752   | 1779573   | IFITM10;CTSD                               |
| chr11 | 6597768   | 6634448   | RRP8;ILK;TAF10;TPP1                        |
| chr11 | 8004244   | 8121243   | CASC23;TUB-AS1;TUB                         |
| chr11 | 9761776   | 10319877  | SBF2-AS1;LOC101928008;SBF2;ADM             |
| chr11 | 12659421  | 12959737  | TEAD1                                      |
| chr11 | 14862440  | 14907231  | PDE3B;CYP2R1                               |
| chr11 | 17478895  | 17559416  | USH1C                                      |
| chr11 | 31494755  | 31832961  | IMMP1L;ELP4;PAX6;PAUPAR                    |
| chr11 | 32372775  | 32450564  | WT1;WT1-AS                                 |
| chr11 | 35647775  | 35833007  | TRIM44                                     |
| chr11 | 45894663  | 45933812  | MAPK8IP1;C11orf94;PEX16;LARGE2             |
| chr11 | 46686030  | 46720912  | ARHGAP1;ZNF408                             |
| chr11 | 47199465  | 47254217  | DDB2;ACP2                                  |
| chr11 | 47550336  | 47599562  | CELF1;PTPMT1;KBTBD4;NDUFS3;FAM180B;C1QTNF4 |
| chr11 | 47701494  | 47782443  | AGBL2;FNBP4                                |

|       |           |           |                                         |
|-------|-----------|-----------|-----------------------------------------|
| chr11 | 59127748  | 59170039  | FAM111A-DT;FAM111A                      |
| chr11 | 61284451  | 61413866  | VWCE;DDB1;TKFC;CYB561A3;TMEM138;TMEM216 |
| chr11 | 61737636  | 61803518  | DAGLA;MYRF-AS1;MYRF;MIR611;TMEM258;FEN1 |
| chr11 | 61935063  | 61980515  | BEST1;FTH1                              |
| chr11 | 62322448  | 62408412  | ASRGL1                                  |
| chr11 | 62596722  | 62630116  | MTA2;EML3;ROM1;B3GAT3                   |
| chr11 | 65029818  | 65073553  | SNX15;ARL2-SNX15;SAC3D1;NAALADL1        |
| chr11 | 66495606  | 66583879  | DPP3;BBS1;ZDHHC24;ACTN3;CTSF            |
| chr11 | 67437406  | 67476752  | PTPRCAP;CORO1B;GPR152;CABP4;TMEM134     |
| chr11 | 68297591  | 68464275  | LRP5                                    |
| chr11 | 70188296  | 70222390  | ANO1;FADD                               |
| chr11 | 71413193  | 71467868  | FLJ42102;DHCR7                          |
| chr11 | 77051961  | 77230241  | OMP;CAPN5;MYO7A                         |
| chr11 | 85632967  | 85671547  | TMEM126B;TMEM126A;CREBZF                |
| chr11 | 86930679  | 86970395  | PRSS23;FZD4                             |
| chr11 | 89162875  | 89310759  | TYR                                     |
| chr11 | 102095447 | 102248424 | YAP1                                    |
| chr11 | 103094410 | 103494863 | DYNC2H1                                 |
| chr11 | 111893564 | 111938722 | CRYAB;HSPB2;C11orf52;HSPB2-C11orf52     |
| chr11 | 116758799 | 116803039 | BUD13;ZPR1;APOA5                        |
| chr11 | 116820751 | 116852622 | APOA4;APOC3;APOA1                       |
| chr11 | 117299557 | 117428266 | BACE1;CEP164                            |
| chr11 | 119323942 | 119361705 | RNF26;C1QTNF5;MFRP                      |
| chr11 | 121277681 | 121328410 | SC5D                                    |
| chr11 | 134054071 | 134167001 | SNORD153;JAM3                           |
| chr12 | 1776963   | 1933666   | ADIPOR2;LRTM2;CACNA2D4                  |
| chr12 | 6824954   | 6862393   | GPR162;P3H3;GNB3;CDCA3                  |
| chr12 | 6927978   | 6961003   | ATN1;RNU7-1;C12orf57;PTPN6              |

|       |           |           |                                      |
|-------|-----------|-----------|--------------------------------------|
| chr12 | 7173685   | 7233574   | PEX5                                 |
| chr12 | 7674784   | 7710775   | GDF3                                 |
| chr12 | 14958042  | 14996865  | ARHGDIB;PDE6H                        |
| chr12 | 32664200  | 32760650  | DNM1L;YARS2                          |
| chr12 | 47957967  | 48019554  | TMEM106C;COL2A1                      |
| chr12 | 49003975  | 49075794  | PRKAG1;DDN-AS1;KMT2D;RHEBL1          |
| chr12 | 52774685  | 52811117  | KRT76;KRT3                           |
| chr12 | 55705367  | 55739705  | ITGA7;BLOC1S1;RDH5;BLOC1S1-RDH5;CD63 |
| chr12 | 56434502  | 56484166  | TIMELESS;MIP;SPRYD4;GLS2             |
| chr12 | 57767761  | 57823071  | METTL1;EEF1AKMT3;TSFM;AVIL           |
| chr12 | 63764833  | 63824792  | RXYLT1;RXYLT1-AS1;MIR10527           |
| chr12 | 66332431  | 67084162  | HELB;GRIP1                           |
| chr12 | 69570426  | 69616570  | FRS2;MIR3913-2;MIR3913-1;CCT2;LRRC10 |
| chr12 | 76329474  | 76363415  | BBS10                                |
| chr12 | 85265220  | 85316784  | ALX1                                 |
| chr12 | 88034016  | 88157099  | C12orf29;CEP290                      |
| chr12 | 89404718  | 89541047  | GALNT4;POC1B;POC1B-GALNT4            |
| chr12 | 91035491  | 91073024  | KERA                                 |
| chr12 | 91125484  | 91198217  | DCN                                  |
| chr12 | 101730499 | 101845959 | SYCP3;GNPTAB                         |
| chr12 | 109558255 | 109613125 | MMAB;MVK                             |
| chr12 | 110109335 | 110233793 | IFT81                                |
| chr12 | 110599027 | 110678431 | TCTN1                                |
| chr12 | 123218385 | 123273079 | MPHOSPH9;C12orf65;CDK2AP1            |
| chr12 | 123656110 | 123723399 | GTF2H3;TCTN2                         |
| chr13 | 20123255  | 20176052  | GJA3                                 |
| chr13 | 26542683  | 26703948  | WASF3                                |
| chr13 | 27605742  | 27759237  | LNX2;POLR1D                          |

|       |           |           |                                   |
|-------|-----------|-----------|-----------------------------------|
| chr13 | 31184975  | 31347276  | B3GLCT                            |
| chr13 | 38672077  | 38902131  | LINC00437;FREM2-AS1;FREM2         |
| chr13 | 48217612  | 48285357  | ITM2B                             |
| chr13 | 48288744  | 48614436  | RB1-DT;LPAR6;RB1;RCBTB2;LINC00462 |
| chr13 | 49516946  | 49600558  | PHF11;SETDB2-PHF11;RCBTB1         |
| chr13 | 76975660  | 77034143  | CLN5;FBXL3                        |
| chr13 | 99966784  | 100001765 | ZIC5;ZIC2;LINC00554               |
| chr13 | 102830831 | 102890995 | BIVM;ERCC5;BIVM-ERCC5             |
| chr13 | 110133963 | 110322157 | COL4A1                            |
| chr13 | 113652219 | 113752736 | ATP4B;GRK1;LINC00552              |
| chr14 | 21265083  | 21366301  | HNRNPC;RPGRIP1                    |
| chr14 | 21506080  | 21552216  | METTL3;SALL2                      |
| chr14 | 24063662  | 24130010  | CARMIL3;CPNE6;NRL;PCK2;DCAF11     |
| chr14 | 24224643  | 24257674  | NEDD8;NEDD8-MDP1;GMPR2;TINF2      |
| chr14 | 39016919  | 39124646  | SEC23A;SEC23A-AS1                 |
| chr14 | 53934736  | 53973761  | MIR5580;BMP4                      |
| chr14 | 56784905  | 56831693  | OTX2                              |
| chr14 | 58412385  | 58566297  | TIMM9;KIAA0586                    |
| chr14 | 60494146  | 60527850  | SIX6                              |
| chr14 | 67661800  | 67831590  | VTI1B;RDH11;RDH12;ZFYVE26         |
| chr14 | 69839131  | 70047366  | SNORD169;SMOC1                    |
| chr14 | 73260107  | 73473617  | PAPLN;NUMB;LOC101928143           |
| chr14 | 74224449  | 74277738  | VSX2                              |
| chr14 | 74483183  | 74627378  | NPC2;ISCA2;LTBP2                  |
| chr14 | 75618625  | 75970079  | FLVCR2;ERG28;TTLL5                |
| chr14 | 77259956  | 77335883  | MIR1260A;NGB;POMT2;GSTZ1          |
| chr14 | 88369924  | 88485350  | SPATA7                            |
| chr14 | 88809153  | 88896078  | TTC8                              |

|       |           |           |                                                     |
|-------|-----------|-----------|-----------------------------------------------------|
| chr14 | 91854411  | 91962987  | TC2N;FBLN5                                          |
| chr14 | 102907663 | 102948596 | TRAF3;AMN                                           |
| chr14 | 104909713 | 104952761 | PLD4                                                |
| chr15 | 27739875  | 28114315  | OCA2                                                |
| chr15 | 30986061  | 31176273  | MTMR10;MIR211;TRPM1                                 |
| chr15 | 43354221  | 43424771  | ADAL;ZSCAN29;TUBGCP4                                |
| chr15 | 48105990  | 48157672  | SLC24A5                                             |
| chr15 | 48393313  | 48660721  | FBN1                                                |
| chr15 | 65077760  | 65130200  | KBTBD13;UBAP1L                                      |
| chr15 | 65596366  | 65675995  | INTS14;SLC24A1                                      |
| chr15 | 68191992  | 68272211  | CALML4;CLN6                                         |
| chr15 | 72671179  | 72753475  | HIGD2B;BBS4                                         |
| chr15 | 74164466  | 74227267  | ISLR;STRA6                                          |
| chr15 | 76332904  | 76920444  | ISL2;MIR3713;SCAPER                                 |
| chr15 | 78089606  | 78186945  | SH2D7;CIB2;IDH3A                                    |
| chr15 | 79194788  | 79224871  | MIR184                                              |
| chr15 | 82644281  | 82725112  | CPEB1;AP3B2;CPEB1-AS1;LOC338963                     |
| chr15 | 86064871  | 87064169  | LINC01584;AGBL1-AS1;LOC105370954;LOC102724452;AGBL1 |
| chr15 | 89194869  | 89349861  | ABHD2;RLBP1;FANCI;MIR6766;POLG                      |
| chr15 | 89593789  | 89678086  | TICRR;KIF7;PLIN1                                    |
| chr15 | 99956437  | 100357005 | ADAMTS17;SPATA41                                    |
| chr15 | 100862714 | 100931626 | LOC105369201;ALDH1A3;LOC101927751                   |
| chr16 | 1336931   | 1380737   | BAIAP3;TSR3;GNPTG;UNKL                              |
| chr16 | 1495427   | 1627072   | TELO2;TMEM204;LOC105371046;IFT140                   |
| chr16 | 1969193   | 2002749   | NOXO1;TBL3;GFER;SYNGR3                              |
| chr16 | 2260881   | 2355746   | RNPS1;MIR3677;MIR940;LOC106660606;MIR4717;ABCA3     |
| chr16 | 3485976   | 3554048   | NAA60;C16orf90;CLUAP1                               |
| chr16 | 13905138  | 13967348  | ERCC4                                               |



|       |          |          |                                        |
|-------|----------|----------|----------------------------------------|
| chr16 | 16134565 | 16238522 | ABCC1;ABCC6                            |
| chr16 | 28459111 | 28510575 | CLN3;APOBR;IL27                        |
| chr16 | 30009427 | 30067978 | DOC2A;C16orf92;TLCD3B;LOC112694756     |
| chr16 | 49472524 | 49872919 | ADAM3B;ZNF423                          |
| chr16 | 51120982 | 51167334 | SALL1                                  |
| chr16 | 53583153 | 53718938 | RPGRIP1L                               |
| chr16 | 54915865 | 54949485 | CRNDE;IRX5                             |
| chr16 | 55309203 | 55345756 | IRX6                                   |
| chr16 | 56450640 | 56597667 | NUDT21;OGFOD1;BBS2;MT4;MT3             |
| chr16 | 57230259 | 57268635 | RSPRY1;ARL2BP                          |
| chr16 | 57867340 | 57986128 | CNGB1                                  |
| chr16 | 67149681 | 67184945 | B3GNT9;TRADD;FBXL8;HSF4;NOL3;KIAA0895L |
| chr16 | 67924750 | 67959131 | PSKH1;CTRL;PSMB10;LCAT                 |
| chr16 | 68621189 | 68742468 | CDH3                                   |
| chr16 | 72078613 | 72127912 | TXNL4B;DHX38                           |
| chr16 | 75457052 | 75510445 | TMEM170A;CHST6                         |
| chr16 | 75521741 | 75571289 | CHST5;TMEM231                          |
| chr16 | 77232813 | 77450034 | ADAMTS18                               |
| chr16 | 79570843 | 79615737 | MAF                                    |
| chr16 | 83994667 | 84057795 | NECAB2;SLC38A8                         |
| chr16 | 88367959 | 88455757 | ZNF469                                 |
| chr16 | 89475719 | 89572766 | ANKRD11;SPG7;SNORD68;RPL13             |
| chr16 | 89711683 | 89831977 | VPS9D1-AS1;VPS9D1;ZNF276;FANCA         |
| chr17 | 1635629  | 1699867  | SCARF1;RILP;PRPF8                      |
| chr17 | 4917277  | 4950023  | GP1BA;SLC25A11;RNF167;PFN1             |
| chr17 | 6378693  | 6571555  | AIPL1;PIMREG;PITPNM3                   |
| chr17 | 7987615  | 8035342  | GUCY2D                                 |
| chr17 | 8209815  | 8263056  | AURKB;LINC00324;CTC1                   |

|       |          |          |                                          |
|-------|----------|----------|------------------------------------------|
| chr17 | 16202191 | 16366797 | NCOR1;MIR1288;PIGL;CENPV                 |
| chr17 | 28531708 | 28567631 | FOXN1;UNC119                             |
| chr17 | 29231859 | 29269494 | CRYBA1                                   |
| chr17 | 32912910 | 32960106 | TMEM98                                   |
| chr17 | 34965512 | 35024743 | LIG3                                     |
| chr17 | 35559795 | 35593863 | SNORD7;SNHG30;PEX12                      |
| chr17 | 40294180 | 40372643 | CDC6;RARA-AS1;RARA;GJD3                  |
| chr17 | 40846303 | 40882223 | KRT12                                    |
| chr17 | 44330246 | 44368106 | GRN;FAM171A2                             |
| chr17 | 44834948 | 44914445 | HIGD1B;EFTUD2;CCDC103;FAM187A            |
| chr17 | 46747506 | 46848154 | NSF;WNT3                                 |
| chr17 | 58190441 | 58234605 | EPX;MKS1                                 |
| chr17 | 60134942 | 60185899 | CA4                                      |
| chr17 | 65085812 | 65242703 | LOC100507002;RGS9                        |
| chr17 | 68244182 | 68437731 | AMZ2;SLC16A6;ARSG;MIR635                 |
| chr17 | 74901083 | 74938256 | USH1G;OTOP2                              |
| chr17 | 75736594 | 75780236 | ITGB4;GALK1;H3F3B                        |
| chr17 | 76512586 | 76568578 | CYGB;PRCD;SNORD1C;SNORD1B;SNORD1A;SNHG16 |
| chr17 | 81494413 | 81552130 | ACTG1;FSCN2                              |
| chr17 | 81635459 | 81678112 | NPLOC4;TSPAN10;PDE6G;OXLD1;CCDC137       |
| chr18 | 2640726  | 2820017  | CBX3P2;SMCHD1                            |
| chr18 | 6926742  | 7132797  | LINC00668;LOC101927188;LAMA1             |
| chr18 | 12313944 | 12392227 | TUBB6;AFG3L2                             |
| chr18 | 34961928 | 35158470 | MAPRE2                                   |
| chr18 | 45785581 | 45982329 | SIGLEC15;EPG5                            |
| chr18 | 51013394 | 51100045 | SMAD4                                    |
| chr18 | 59252035 | 59289086 | RAX                                      |
| chr18 | 68658688 | 68730108 | TMX3                                     |

|       |          |          |                                           |
|-------|----------|----------|-------------------------------------------|
| chr18 | 79664803 | 79769503 | LOC284241;CTDP1                           |
| chr19 | 1476166  | 1512927  | C19orf25;PCSK4;REEP6;ADAMTSL5             |
| chr19 | 3754089  | 3787228  | APBA3;MRPL54;RAX2;MATK                    |
| chr19 | 5850826  | 5885540  | FUT3;LOC101928844;FUT5                    |
| chr19 | 6662704  | 6745562  | TNFSF14;C3;MIR6791;GPR108                 |
| chr19 | 7333937  | 7487485  | ARHGEF18                                  |
| chr19 | 7519004  | 7576764  | ZNF358;MCOLN1;PNPLA6                      |
| chr19 | 8565240  | 8625735  | MYO1F;ADAMTS10                            |
| chr19 | 9838718  | 9951515  | PIN1;OLFM2                                |
| chr19 | 11184295 | 11277524 | KANK2;LOC105372273;ANGPTL8;DOCK6          |
| chr19 | 12631511 | 12681742 | ZNF791;MAN2B1;WDR83OS;WDR83;DHPS          |
| chr19 | 13191442 | 13648025 | CACNA1A                                   |
| chr19 | 13916187 | 13968392 | CC2D1A;PODNL1;DCAF15                      |
| chr19 | 16877951 | 17041815 | SIN3B;F2RL3;CPAMD8                        |
| chr19 | 29683937 | 29730789 | C19orf12                                  |
| chr19 | 32660848 | 32693300 | ANKRD27;RGS9BP                            |
| chr19 | 38229035 | 38307615 | DPF1;PPP1R14A;SPINT2;C19orf33             |
| chr19 | 43712983 | 43769962 | IRGC;SMG9                                 |
| chr19 | 45334837 | 45385918 | KLC3;ERCC2                                |
| chr19 | 45392334 | 45493828 | PPP1R13L;CD3EAP;ERCC1;MIR6088;FOSB;RTN2   |
| chr19 | 45512767 | 45617212 | VASP;OPA3;GPR4                            |
| chr19 | 46731046 | 46791988 | STRN4;FKRP;SLC1A5                         |
| chr19 | 47804779 | 47858330 | CRX                                       |
| chr19 | 48950309 | 48981879 | BAX;FTL                                   |
| chr19 | 49046066 | 49080076 | CGB8;CGB7;NTF4;KCNA7                      |
| chr19 | 49576182 | 49641439 | NOSIP;PRRG2;PRR12;RRAS                    |
| chr19 | 49803282 | 49855383 | AP2A1;FUZ;MIR6800;MED25;PTOV1-AS1;MIR4749 |
| chr19 | 51364909 | 51402974 | ETFB;CLDND2;NKG7;LIM2;C19orf84            |

|       |           |           |                                 |
|-------|-----------|-----------|---------------------------------|
| chr19 | 54100410  | 54146719  | OSCAR;NDUFA3;TFPT;PRPF31        |
| chr2  | 1616887   | 1759852   | PXDN                            |
| chr2  | 15151914  | 15576334  | NBAS                            |
| chr2  | 27027364  | 27085622  | TMEM214;AGBL5-AS1;AGBL5;OST4    |
| chr2  | 27362235  | 27395790  | EIF2B4;SNX17;ZNF513;FTH1P3      |
| chr2  | 27429377  | 27504805  | NRBP1;KRTCAP3;IFT172;FNDC4      |
| chr2  | 29045976  | 29089523  | TOGARAM2;PCARE                  |
| chr2  | 36340778  | 36566135  | CRIM1-DT;CRIM1                  |
| chr2  | 38051973  | 38124902  | RMDN2;CYP1B1                    |
| chr2  | 44926702  | 44961071  | LINC01833;SIX3-AS1;SIX3         |
| chr2  | 55850967  | 55939139  | EFEMP1                          |
| chr2  | 58144243  | 58256410  | VRK2;FANCL                      |
| chr2  | 61002225  | 61066990  | PUS10;PEX13                     |
| chr2  | 61809848  | 61869143  | FAM161A                         |
| chr2  | 63104559  | 63842843  | DBIL5P2;WDPCP;MDH1              |
| chr2  | 73370758  | 73640166  | ALMS1-IT1;ALMS1                 |
| chr2  | 73911826  | 73973961  | ACTG2;DGUOK                     |
| chr2  | 96259338  | 96336271  | TMEM127;CIAO1;SNRNP200;ITPRIPL1 |
| chr2  | 96745902  | 96826874  | MIR3127;CNNM4;CNNM3-DT          |
| chr2  | 98331188  | 98413601  | CNGA3                           |
| chr2  | 110107311 | 110220066 | MALL;NPHP1;MTLN                 |
| chr2  | 111883607 | 112044561 | ANAPC1;MERTK                    |
| chr2  | 120720623 | 121007653 | GLI2                            |
| chr2  | 127242290 | 127309166 | ERCC3                           |
| chr2  | 135037289 | 135191667 | SNORA40B;RAB3GAP1               |
| chr2  | 144349364 | 144536057 | ZEB2;ZEB2-AS1;LOC105373656      |
| chr2  | 165842475 | 165968851 | LOC100506124;TTC21B-AS1;TTC21B  |
| chr2  | 167278001 | 167889045 | B3GALT1                         |

|       |           |           |                                                              |
|-------|-----------|-----------|--------------------------------------------------------------|
| chr2  | 169112109 | 169377534 | LRP2                                                         |
| chr2  | 169464480 | 169521655 | BBS5                                                         |
| chr2  | 177377746 | 177582024 | LOC100130691;AGPS;TTC30B                                     |
| chr2  | 181520041 | 181695827 | ITGA4;CERKL;NEUROD1                                          |
| chr2  | 190865821 | 190980552 | GLS                                                          |
| chr2  | 201605184 | 201658570 | C2CD6;TMEM237                                                |
| chr2  | 206099817 | 206174509 | GCSHP3;NDUFS1;SNORD51;SNORA41;EEF1B2                         |
| chr2  | 207747598 | 207784906 | MIR4775;CCNYL1;FZD5                                          |
| chr2  | 208106607 | 208161158 | CRYGD;CRYGC;CRYGB;LOC100507443                               |
| chr2  | 208251255 | 208373746 | IDH1;IDH1-AS1;PIKFYVE                                        |
| chr2  | 218766749 | 218830293 | CYP27A1;MIR9500                                              |
| chr2  | 219194772 | 219233994 | ZFAND2B;ABCB6;ATG9A                                          |
| chr2  | 222184887 | 222313998 | PAX3;CCDC140                                                 |
| chr2  | 227310151 | 227372836 | COL4A3;LOC654841;MFF                                         |
| chr2  | 231717433 | 231801272 | PDE6D                                                        |
| chr2  | 232505388 | 232540716 | PRSS56;CHRND                                                 |
| chr2  | 232750802 | 232791565 | KCNJ13                                                       |
| chr2  | 233292816 | 233362055 | ATG16L1;SAG                                                  |
| chr2  | 234035679 | 234092134 | SPP2                                                         |
| chr2  | 238305441 | 238415897 | TRAF3IP1                                                     |
| chr20 | 408596    | 477566    | RBCK1;TBC1D20                                                |
| chr20 | 2643395   | 2679219   | MIR1292;SNORD110;SNORA51;SNORD86;SNORD56;SNORD57;NOP56;IDH3B |
| chr20 | 3193868   | 3254559   | DDRKG1;ITPA;SLC4A11                                          |
| chr20 | 3873839   | 3944887   | MAVS;PANK2;MIR103B2;MIR103A2                                 |
| chr20 | 10386009  | 10449222  | MKKS                                                         |
| chr20 | 10622684  | 10688999  | SLX4IP;MIR6870;JAG1                                          |
| chr20 | 17478905  | 17584220  | PCSK2;BFSP1                                                  |
| chr20 | 17941979  | 18074188  | SNORD17;SNX5;MGME1;OVOL2                                     |

|       |          |          |                                         |
|-------|----------|----------|-----------------------------------------|
| chr20 | 21110983 | 21261622 | KIZ-AS1;KIZ                             |
| chr20 | 25055885 | 25097141 | ACSS1;VSX1                              |
| chr20 | 25279742 | 25405835 | PYGB;ABHD12                             |
| chr20 | 32262651 | 32350011 | KIF3B                                   |
| chr20 | 33796348 | 33869366 | ZNF341-AS1;CHMP4B                       |
| chr20 | 35440164 | 35534280 | MIR1289-1;GDF5;CEP250;C20orf173         |
| chr20 | 51767331 | 51817521 | ATP9A;SALL4                             |
| chr20 | 57153753 | 57281641 | BMP7-AS1;BMP7                           |
| chr20 | 63966132 | 64048100 | ZNF512B;SAMMD10;PRPF6;C20orf204         |
| chr21 | 41724369 | 41782089 | MIR6814;RIPK4                           |
| chr21 | 43038191 | 43091943 | CBS;CBSL                                |
| chr21 | 43154008 | 43187805 | CRYAA;CRYAA2                            |
| chr21 | 44270838 | 44313648 | AIRE                                    |
| chr21 | 44313944 | 44354402 | PFKL;CFAP410                            |
| chr21 | 45390165 | 45528720 | COL18A1-AS2;COL18A1-AS1;MIR6815;COL18A1 |
| chr22 | 18062923 | 18120396 | PEX26                                   |
| chr22 | 25184858 | 25246870 | KIAA1671;CRYBB3;CRYBB2                  |
| chr22 | 26584278 | 26645669 | TPST2;CRYBB1;CRYBA4                     |
| chr22 | 29465218 | 29506390 | NEFH                                    |
| chr22 | 29588556 | 29713598 | NF2                                     |
| chr22 | 32786705 | 32878041 | TIMP3                                   |
| chr22 | 36266280 | 36403010 | APOL1;MIR6819;MYH9                      |
| chr22 | 36743202 | 36791256 | LOC105373021;IFT27                      |
| chr22 | 41432830 | 41544273 | TOB2;PHF5A;ACO2;POLR3H                  |
| chr22 | 50202689 | 50260023 | SELENOO;TUBGCP6;HDAC10                  |
| chr3  | 3111933  | 3165879  | TRNT1                                   |
| chr3  | 4478345  | 4862506  | ITPR1-DT;EGOT;ITPR1                     |
| chr3  | 10011370 | 10116932 | CIDCEP1;FANCD2;FANCD2OS                 |

|      |           |           |                                                 |
|------|-----------|-----------|-------------------------------------------------|
| chr3 | 14130147  | 14193621  | TMEM43;XPC                                      |
| chr3 | 14387576  | 14504349  | SLC6A6                                          |
| chr3 | 24672887  | 25612932  | RARB-AS1;RARB                                   |
| chr3 | 41179741  | 41275096  | CTNNB1                                          |
| chr3 | 43064229  | 43121085  | POMGNT2                                         |
| chr3 | 45808316  | 46010824  | LZTFL1;CCR9;CXCR6;FYCO1                         |
| chr3 | 48450811  | 48482645  | ATRIP;TREX1;ATRIP-TREX1;SHISA5                  |
| chr3 | 49106114  | 49148118  | USP19;LAMB2                                     |
| chr3 | 49453703  | 49550618  | DAG1                                            |
| chr3 | 50176610  | 50212696  | SEMA3F;GNAT1                                    |
| chr3 | 50596520  | 50664291  | CISH;MAPKAPK3                                   |
| chr3 | 63848155  | 64018462  | C3orf49;THOC7-AS1;THOC7;SCAANT1;ATXN7;PSMD6-AS2 |
| chr3 | 69724456  | 69983336  | MITF                                            |
| chr3 | 93965139  | 94070678  | PROS1;STX19;ARL13B;DHFR2                        |
| chr3 | 97749521  | 97816229  | EPHA6;ARL6                                      |
| chr3 | 101207546 | 101335575 | IMPG2                                           |
| chr3 | 121754761 | 121850079 | IQCB1                                           |
| chr3 | 129513639 | 129550344 | IFT122;RHO                                      |
| chr3 | 132665609 | 132737432 | UBA5;NPHP3;NPHP3-ACAD11                         |
| chr3 | 133385056 | 133490222 | TMEM108;BFSP2-AS1;BFSP2                         |
| chr3 | 138929224 | 138962137 | LINC01391;FOXL2;FOXL2NB                         |
| chr3 | 150911163 | 150987727 | CLRN1                                           |
| chr3 | 155806024 | 155869456 | C3orf33;SLC33A1                                 |
| chr3 | 170444548 | 170601075 | SLC7A14-AS1;SLC7A14                             |
| chr3 | 180968697 | 181004774 | FXR1;DNAJC19                                    |
| chr3 | 181696925 | 181729436 | SOX2                                            |
| chr3 | 184227301 | 184264548 | MIR1224;VWA5B2;ALG3;EEF1AKMT4;CAMK2N2           |
| chr3 | 186523441 | 186561702 | CRYGS                                           |

|      |           |           |                              |
|------|-----------|-----------|------------------------------|
| chr3 | 189941728 | 190137437 | P3H2                         |
| chr3 | 193578144 | 193712811 | OPA1-AS1;OPA1                |
| chr3 | 196199222 | 196302957 | ZDHC19;SLC51A;PCYT1A         |
| chr3 | 196691277 | 196727250 | CEP19                        |
| chr4 | 610573    | 685782    | PDE6B;ATP5ME;MYL5            |
| chr4 | 6254849   | 6318265   | WFS1                         |
| chr4 | 8831076   | 8886839   | HMX1                         |
| chr4 | 13346354  | 13499365  | RAB28                        |
| chr4 | 15454865  | 15616552  | CC2D2A                       |
| chr4 | 15948076  | 16099378  | FGFBP2;PROM1                 |
| chr4 | 22330071  | 22531066  | LOC100505912;MIR12115;ADGRA3 |
| chr4 | 36266616  | 36362511  | LOC439933;DTHD1              |
| chr4 | 39167504  | 39300810  | WDR19                        |
| chr4 | 47920977  | 48031681  | CNGA1;LOC101927157           |
| chr4 | 55331213  | 55388100  | SRD5A3;SRD5A3-AS1            |
| chr4 | 71047667  | 71587087  | SLC4A4                       |
| chr4 | 78042323  | 78559269  | SNORD161;FRAS1               |
| chr4 | 99549081  | 99638997  | TRMT10A;MTTP                 |
| chr4 | 102853974 | 102907807 | UBE2D3;CISD2                 |
| chr4 | 109833107 | 109887315 | RRH;LRIT3                    |
| chr4 | 110602423 | 110657123 | PANCR;PITX2                  |
| chr4 | 112270509 | 112457621 | AP1AR;TIFA;ALPK1             |
| chr4 | 120669919 | 120937870 | PRDM5                        |
| chr4 | 121809329 | 121885487 | EXOSC9;CCNA2;BBS7            |
| chr4 | 122137331 | 122379167 | KIAA1109                     |
| chr4 | 122717702 | 122759942 | CETN4P;BBS12                 |
| chr4 | 127865893 | 127981034 | PLK4;MFSD8                   |
| chr4 | 128849921 | 129108600 | JADE1;SCLT1                  |



|      |           |           |                                                         |
|------|-----------|-----------|---------------------------------------------------------|
| chr4 | 150567151 | 150599693 | LOC729558;MAB21L2                                       |
| chr4 | 154611945 | 154768120 | FGG;LRAT                                                |
| chr4 | 182128987 | 182818024 | TENM3-AS1;MIR1305;TENM3                                 |
| chr4 | 186176567 | 186228463 | FLJ38576;CYP4V2                                         |
| chr4 | 186572794 | 186741722 | FAT1                                                    |
| chr5 | 203303    | 272082    | CCDC127;SDHA;HRAT5                                      |
| chr5 | 33929623  | 34023104  | RXFP3;SLC45A2;AMACR                                     |
| chr5 | 37091228  | 37264376  | CPLANE1;LOC105374727                                    |
| chr5 | 60851454  | 60960073  | ERCC8                                                   |
| chr5 | 64751368  | 65117412  | SREK1IP1;CWC27                                          |
| chr5 | 68200756  | 68316821  | PIK3R1                                                  |
| chr5 | 75659124  | 75732448  | ANKDD1B;POC5;LOC441087                                  |
| chr5 | 83456618  | 83597303  | VCAN-AS1;VCAN                                           |
| chr5 | 90514344  | 91179437  | POLR3G;LYSMD3;ADGRV1                                    |
| chr5 | 93568222  | 93609611  | NR2F1-AS1;NR2F1                                         |
| chr5 | 110723136 | 110780161 | TMEM232;SLC25A46                                        |
| chr5 | 111077321 | 111145502 | TSLP;WDR36                                              |
| chr5 | 136013988 | 136078818 | TGFBI                                                   |
| chr5 | 138595967 | 139308557 | LOC105379194;LRRTM2;CTNNA1;SIL1;SNORA74D;SNORA74A;SNHG4 |
| chr5 | 140658035 | 140706537 | IK;WDR55;DND1;HARS;HARS2;ZMAT2                          |
| chr5 | 149842953 | 149959793 | PPARGC1B;LOC644762;PDE6A                                |
| chr5 | 150342629 | 150415308 | TCOF1;CD74                                              |
| chr5 | 172310000 | 172469525 | SH3PXD2B                                                |
| chr5 | 178962587 | 179011206 | ZNF454;GRM6                                             |
| chr6 | 1594915   | 1628897   | FOXCUT;FOXC1                                            |
| chr6 | 10378186  | 10434659  | TFAP2A-AS2;TFAP2A;TFAP2A-AS1                            |
| chr6 | 10477223  | 10644368  | GCNT2                                                   |
| chr6 | 10747723  | 10853553  | TMEM14B;MAK                                             |

|      |           |           |                                            |
|------|-----------|-----------|--------------------------------------------|
| chr6 | 30702435  | 30740538  | MDC1-AS1;MDC1;TUBB                         |
| chr6 | 31882785  | 31967084  | EHMT2;ZBTB12;C2;C2-AS1;CFB;MIR1236;NELFE   |
| chr6 | 33147681  | 33207499  | HCG24;COL11A2;RXRB;SLC39A7;HSD17B8         |
| chr6 | 35437338  | 35482104  | FANCE;MIR7111;RPL10A                       |
| chr6 | 35482874  | 35527896  | TEAD3;TULP1                                |
| chr6 | 42140406  | 42209956  | C6orf132;LOC114841037;GUCA1A;GUCA1B        |
| chr6 | 42681598  | 42737597  | UBR2;PRPH2;ATP6V0CP3                       |
| chr6 | 42948865  | 42994181  | CNPY3-GNMT;GNMT;PEX6                       |
| chr6 | 43494702  | 43635523  | TJAP1;LRRC73;YIPF3;POLR1C;XPO5;POLH;GTPBP2 |
| chr6 | 63704980  | 65722226  | PHF3;SCAT8;LOC441155;EYS                   |
| chr6 | 70201040  | 70318084  | COL19A1;COL9A1                             |
| chr6 | 71871550  | 72418145  | RIMS1                                      |
| chr6 | 75906114  | 76087678  | MYO6;IMPG1                                 |
| chr6 | 79469991  | 79552458  | LCA5                                       |
| chr6 | 79899814  | 79962553  | ELOVL4                                     |
| chr6 | 99417325  | 99536728  | PNISR;LOC101927365;USP45;TSTD3             |
| chr6 | 99591774  | 99630578  | PRDM13                                     |
| chr6 | 106555771 | 106644498 | CRYBG1;RTN4IP1                             |
| chr6 | 108196222 | 108276246 | SNX3                                       |
| chr6 | 121064494 | 121349745 | TBC1D32                                    |
| chr6 | 121420595 | 121464727 | GJA1                                       |
| chr6 | 135268407 | 135513434 | AHI1                                       |
| chr6 | 136807564 | 136928934 | PEX7;SLC35D3                               |
| chr6 | 143435805 | 143505616 | ADAT2;PEX3                                 |
| chr6 | 158153350 | 158214344 | SERAC1;GTF2H5                              |
| chr7 | 5511409   | 5578902   | FBXL18;LOC221946;ACTB                      |
| chr7 | 6779134   | 6841770   | RSPH10B2;RSPH10B;CCZ1B                     |
| chr7 | 16072525  | 16517504  | CRPPA-AS1;CRPPA;SOSTDC1                    |

|      |           |           |                                          |
|------|-----------|-----------|------------------------------------------|
| chr7 | 16901359  | 17361152  | AHR                                      |
| chr7 | 22874371  | 23029130  | FAM126A                                  |
| chr7 | 23090758  | 23192914  | KLHL7-DT;KLHL7                           |
| chr7 | 33079797  | 33892180  | RP9;BBS9                                 |
| chr7 | 40111027  | 40149622  | MPLKIP                                   |
| chr7 | 66613881  | 66664067  | KCTD7                                    |
| chr7 | 76594986  | 76642279  | POMZP3;LOC100133091                      |
| chr7 | 83348238  | 83664139  | SEMA3E                                   |
| chr7 | 92069987  | 92149803  | AKAP9;CYP51A1                            |
| chr7 | 92472020  | 92543520  | ERVW-1;PEX1;RBM48                        |
| chr7 | 99377048  | 99423597  | ARPC1B;PDAP1;MIR12119;BUD31              |
| chr7 | 120772320 | 120873402 | TSPAN12                                  |
| chr7 | 128377277 | 128425252 | LOC107986845;IMPDH1                      |
| chr7 | 128757485 | 128790794 | CALU;OPN1SW                              |
| chr7 | 129173633 | 129228545 | SMO                                      |
| chr7 | 130378771 | 130457433 | CPA1;CEP41                               |
| chr7 | 138816381 | 138996389 | KIAA1549                                 |
| chr7 | 140278693 | 140419433 | SLC37A3                                  |
| chr7 | 141536278 | 141670244 | AGK                                      |
| chr7 | 141723334 | 141802922 | WEE2;WEE2-AS1;SSBP1;TAS2R3;TAS2R4;TAS2R5 |
| chr7 | 151160698 | 151202832 | GBX1;ASB10                               |
| chr7 | 155784980 | 155827463 | SHH                                      |
| chr8 | 1740778   | 1816711   | LOC101927752;CLN8;MIR3674                |
| chr8 | 10591349  | 10727187  | RP1L1;MIR4286;C8orf74                    |
| chr8 | 27756949  | 27827640  | CCDC25;ESCO2                             |
| chr8 | 31018788  | 31191138  | PURG;WRN                                 |
| chr8 | 38981754  | 39120445  | HTRA4;TM2D2;SNORD38D;ADAM9               |
| chr8 | 43125464  | 43217855  | HGSNAT                                   |

|      |           |           |                                                |
|------|-----------|-----------|------------------------------------------------|
| chr8 | 54494422  | 54886720  | RP1                                            |
| chr8 | 60663740  | 60883028  | CHD7                                           |
| chr8 | 63033553  | 63101053  | GGH;TTPA                                       |
| chr8 | 67047417  | 67211778  | COPS5;CSPP1                                    |
| chr8 | 71182433  | 71607025  | EYA1                                           |
| chr8 | 76965258  | 77016044  | MIR3149;PEX2                                   |
| chr8 | 86538977  | 86758675  | CPNE3;CNGB3                                    |
| chr8 | 93739844  | 93834234  | RBM12B-AS1;RBM12B;TMEM67                       |
| chr8 | 95229913  | 95284201  | C8orf37                                        |
| chr8 | 96127333  | 96175806  | GDF6                                           |
| chr8 | 98998266  | 99892580  | VPS13B;MIR599;MIR875;COX6C                     |
| chr8 | 103485610 | 104269430 | LOC105375690;RIMS2                             |
| chr8 | 143801344 | 143844352 | MIR937;SCRIB;PUF60;MIR6845;NRBP2               |
| chr8 | 144318957 | 144376286 | DGAT1;SCRT1;TMEM249;FBXL6;SLC52A2;LOC101928902 |
| chr9 | 2702510   | 2745037   | KCNV2                                          |
| chr9 | 12670439  | 12725285  | TYRP1                                          |
| chr9 | 14722152  | 14925995  | CER1;FREM1                                     |
| chr9 | 26932039  | 27081134  | PLAA;IFT74-AS1;LRRC19;IFT74                    |
| chr9 | 32440302  | 32567586  | ACO1;DDX58;TOPORS;SMIM27                       |
| chr9 | 34623133  | 34666035  | ARID3C;SIGMAR1;GALT;IL11RA;CCL27;LOC730098     |
| chr9 | 69020751  | 69094076  | FXN                                            |
| chr9 | 70794975  | 70825084  | MIR204                                         |
| chr9 | 78221062  | 78294690  | CEP78                                          |
| chr9 | 91198815  | 91376918  | AUH                                            |
| chr9 | 95427980  | 95532057  | LOC100507346;PTCH1                             |
| chr9 | 97397096  | 97511125  | TDRD7                                          |
| chr9 | 97659909  | 97712340  | NCBP1;XPA                                      |
| chr9 | 100084243 | 100317175 | ERP44;INVS                                     |

|      |           |           |                                                      |
|------|-----------|-----------|------------------------------------------------------|
| chr9 | 105543122 | 105668820 | FSD1L;FKTN;TAL2                                      |
| chr9 | 113260642 | 113309009 | SLC31A1;CDC26;PRPF4;RNF183                           |
| chr9 | 114387080 | 114520473 | AKNA;WHRN                                            |
| chr9 | 116672305 | 116716300 | ASTN2;TRIM32                                         |
| chr9 | 121192794 | 121347843 | RAB14;GSN-AS1;GSN                                    |
| chr9 | 126598928 | 126716032 | LMX1B                                                |
| chr9 | 130678721 | 130722288 | PRDM12;EXOSC2                                        |
| chr9 | 131487789 | 131538806 | SNORD62A;SNORD62B;PRRC2B;POMT1;UCK1                  |
| chr9 | 136413619 | 136454845 | PMPCA;INPP5E                                         |
| chr9 | 137226287 | 137258707 | CYSRT1;RNF224;SLC34A3;TUBB4B;FAM166A;STPG3;STPG3-AS1 |
| chrM | 0         | 16569     | RNR1;RNR2;MIR12136                                   |
| chrX | 9710346   | 9801297   | TBL1X;GPR143                                         |
| chrX | 11096301  | 11138086  | HCCS                                                 |
| chrX | 13719743  | 13792955  | TRAPPC2;OFD1                                         |
| chrX | 17360200  | 17750994  | MIR4768;NHS-AS1;LOC101928389;NHS                     |
| chrX | 18624688  | 18687108  | CDKL5;RS1                                            |
| chrX | 31082677  | 33354609  | DMD;MIR3915;MIR548F5                                 |
| chrX | 38254163  | 38342544  | RPGR                                                 |
| chrX | 40034815  | 40192329  | BCOR                                                 |
| chrX | 41432343  | 41490710  | NYX                                                  |
| chrX | 43933776  | 43988395  | NDP-AS1;NDP                                          |
| chrX | 44858188  | 45127779  | KDM6A                                                |
| chrX | 46822043  | 46897358  | RP2                                                  |
| chrX | 47127071  | 47160466  | NDUFB11                                              |
| chrX | 48493959  | 48535814  | LOC101927635;PORCN;EBP                               |
| chrX | 48786377  | 48839982  | GATA1;HDAC6;ERAS;PCSK1N                              |
| chrX | 48875197  | 48918402  | TIMM17B;PQBP1;SLC35A2                                |
| chrX | 49190063  | 49248371  | SYP;SYP-AS1;CACNA1F                                  |

|      |           |           |                                    |
|------|-----------|-----------|------------------------------------|
| chrX | 70118447  | 70181324  | IGBP1                              |
| chrX | 77884440  | 78144295  | MAGT1;COX7B;PGAM4;ATP7A;PGK1;TAF9B |
| chrX | 79999753  | 80046774  | TBX22                              |
| chrX | 85846180  | 86062561  | MIR361;CHM                         |
| chrX | 101330661 | 101363742 | TIMM8A                             |
| chrX | 107613428 | 107666993 | PRPS1                              |
| chrX | 110658856 | 110810819 | CHRD1                              |
| chrX | 129524849 | 129607561 | OCRL                               |
| chrX | 132061990 | 132143020 | STK26;FRMD7                        |
| chrX | 150965509 | 151005771 | HMGB3                              |
| chrX | 153914225 | 153950080 | ARHGAP4;NAA10;RENBP                |
| chrX | 154129243 | 154174032 | OPN1LW                             |
